# Supplementary material for: Synthesis and Antiprotozoal Activity of Azabicyclo-Nonane Pyrimidine Hybrids
Source: MDPI journal article supplement (doi:10.3390/molecules28010307), 2022-12-30
Supplement: s1 [file s1]

## Supplementary material

### Synthesis and Antiprotozoal Activity of Azabicyclo-nonane Pyrimidine Hybrids

Clemens Hinteregger <sup>1</sup>, Johanna Dolensky <sup>1</sup>, Werner Seebacher <sup>1</sup>, Robert Saf <sup>2</sup>, Pascal Mäser <sup>3,4</sup>,  
Marcel Kaiser <sup>3,4</sup> and Robert Weis <sup>1,\*</sup>

<sup>1</sup> Pharmaceutical Chemistry, Institute of Pharmaceutical Sciences, University of Graz,  
Schubertstraße 1, A-8010 Graz, Austria

<sup>2</sup> Institute for Chemistry and Technology of Materials (ICTM), Graz University of  
Technology, Stremayrgasse 9, A-8010 Graz, Austria

<sup>3</sup> Swiss Tropical and Public Health Institute, Kreuzstraße 2, CH-4123 Allschwil,  
Switzerland

<sup>4</sup> Swiss Tropical and Public Health Institute, University of Basel, Petersplatz 1, CH-4003  
Basel, Switzerland

\* Correspondence: robert.weis@uni-graz.at; Tel.: +43-316-380-5379

**NMR and HRMS spectra of compounds 5 – 24**  
**Synthesis route of compounds 1-4**

## 5 H nmr

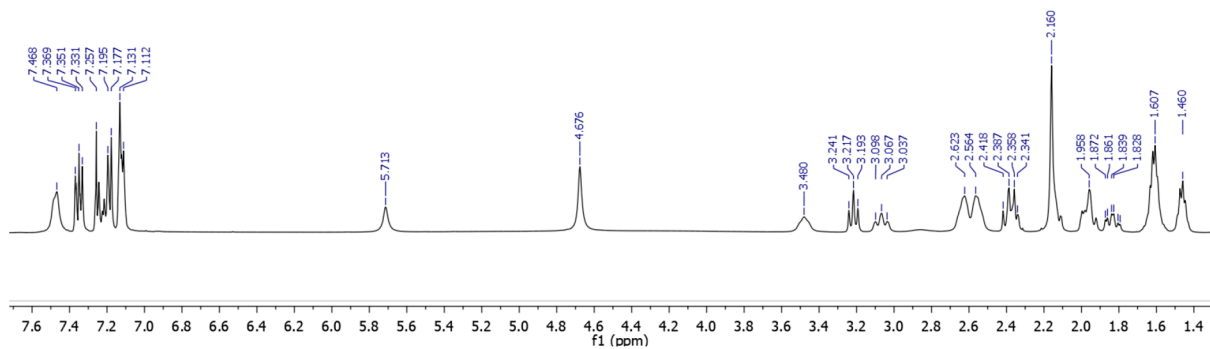

## 5 C nmr

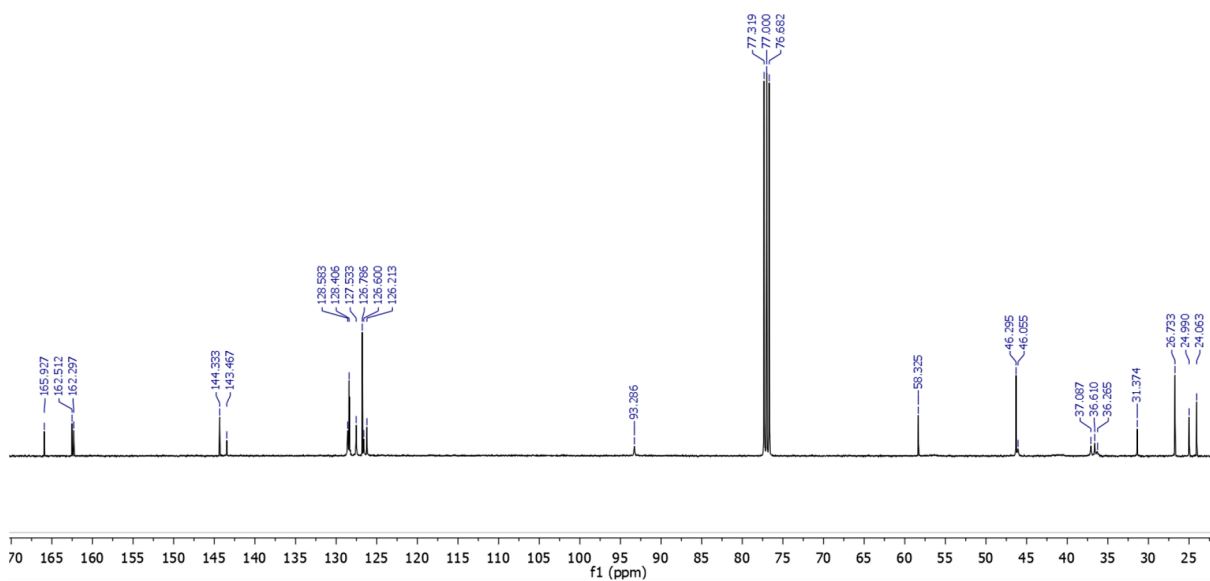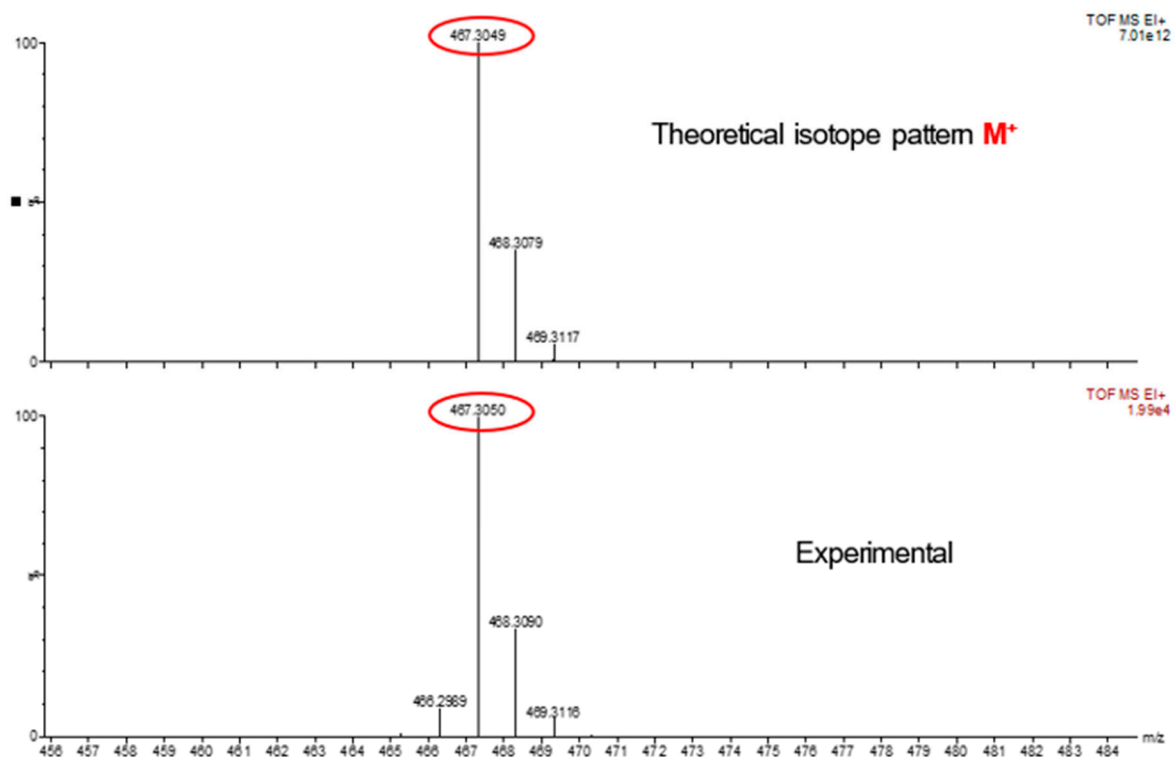

## $^1\text{H}$ nmr

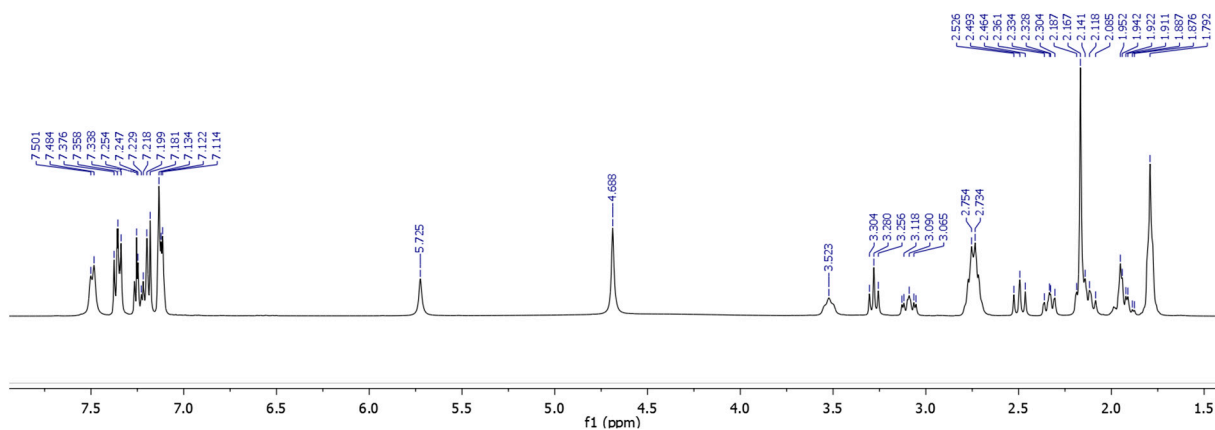

## $^{13}\text{C}$ nmr

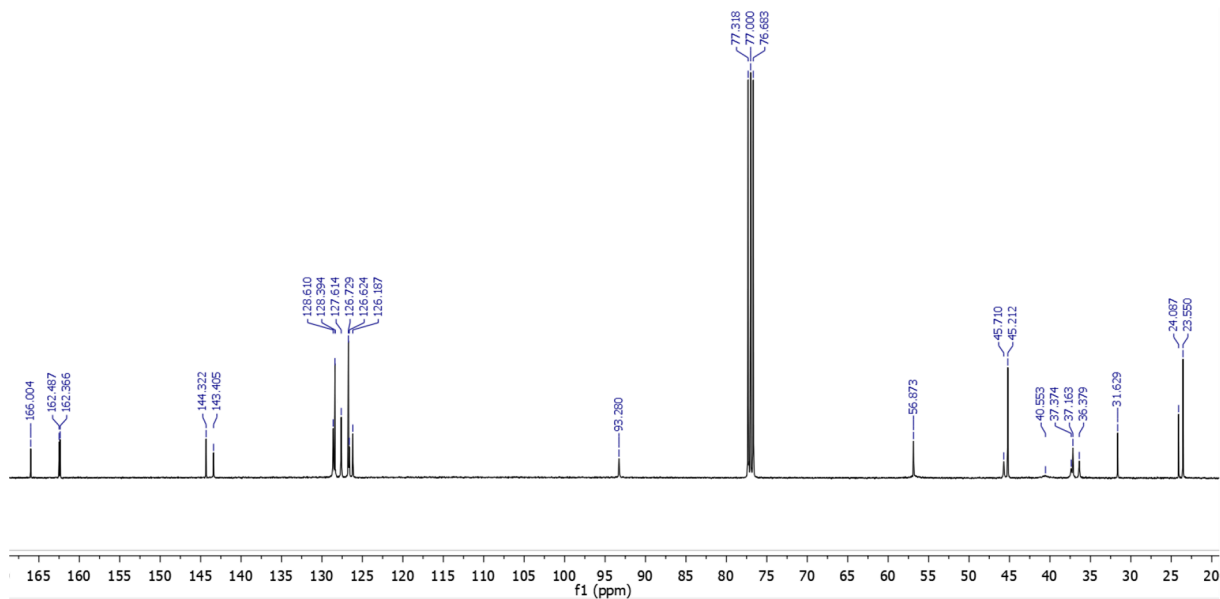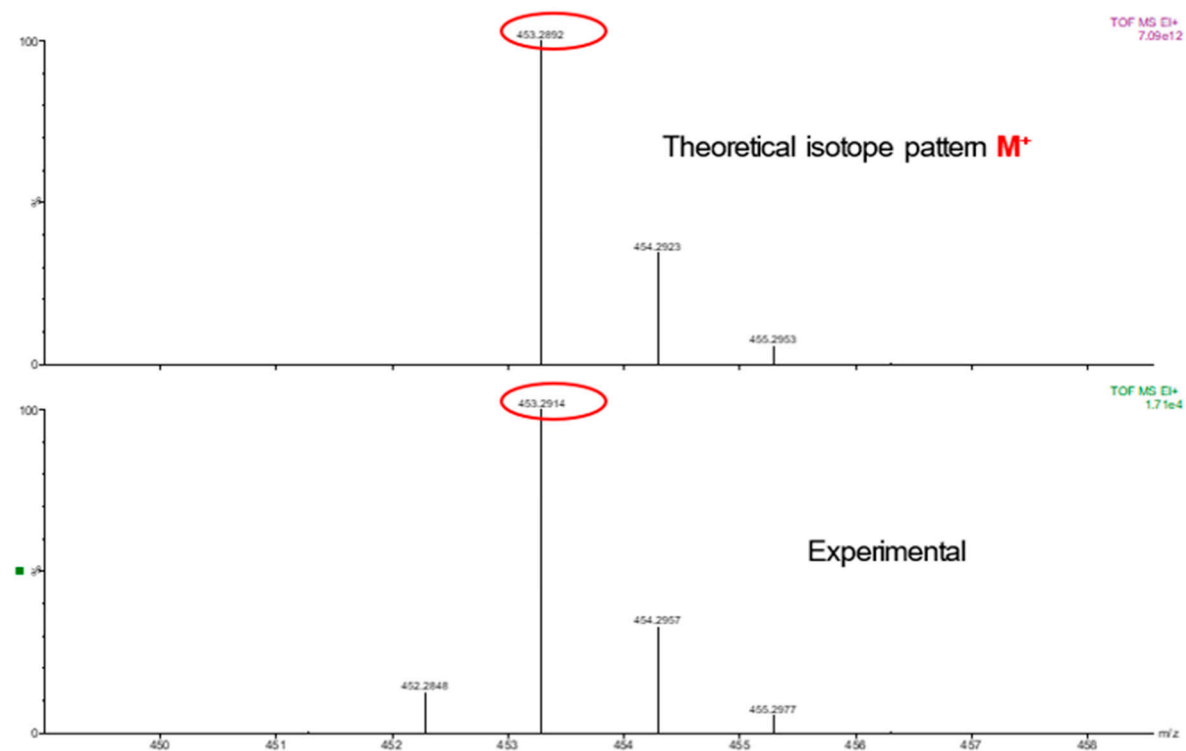

## 7 H nmr

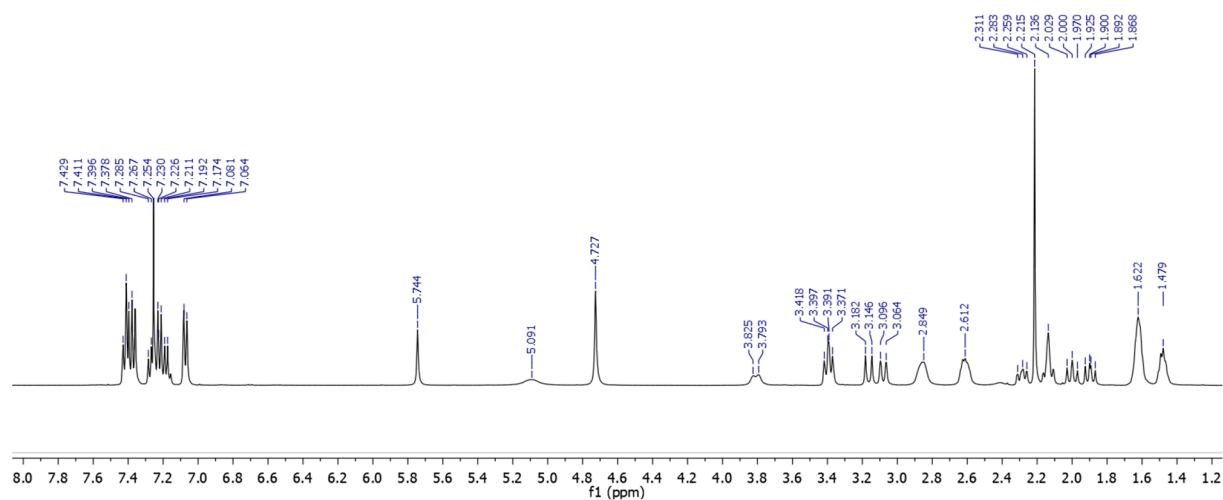

## 7 C nmr

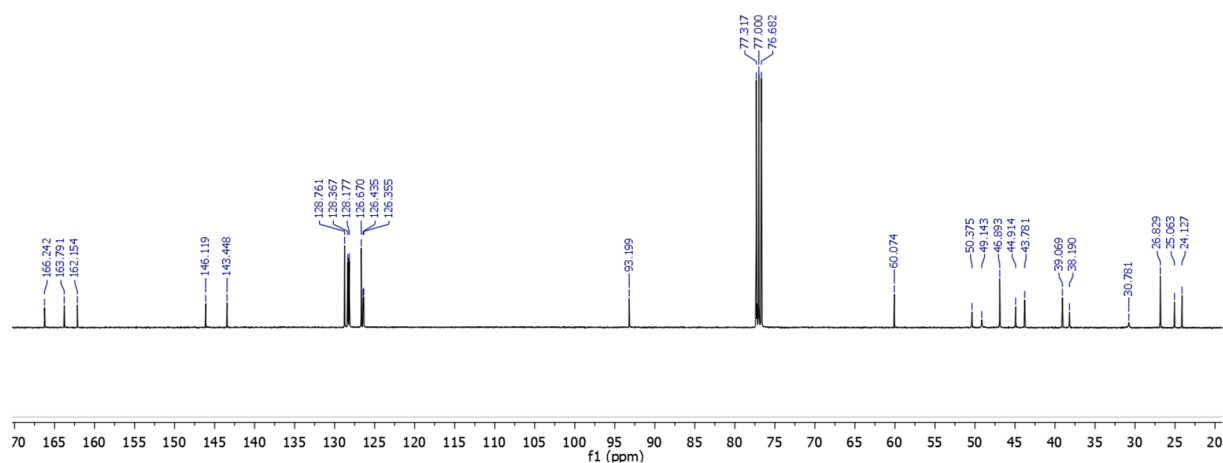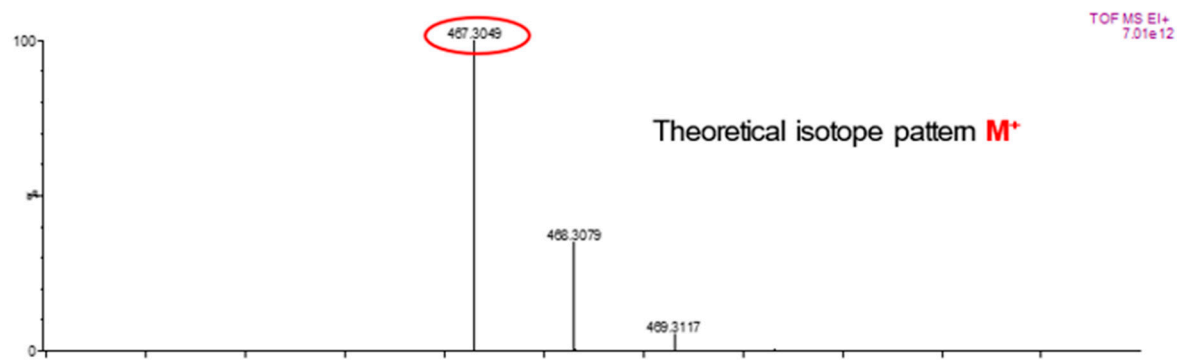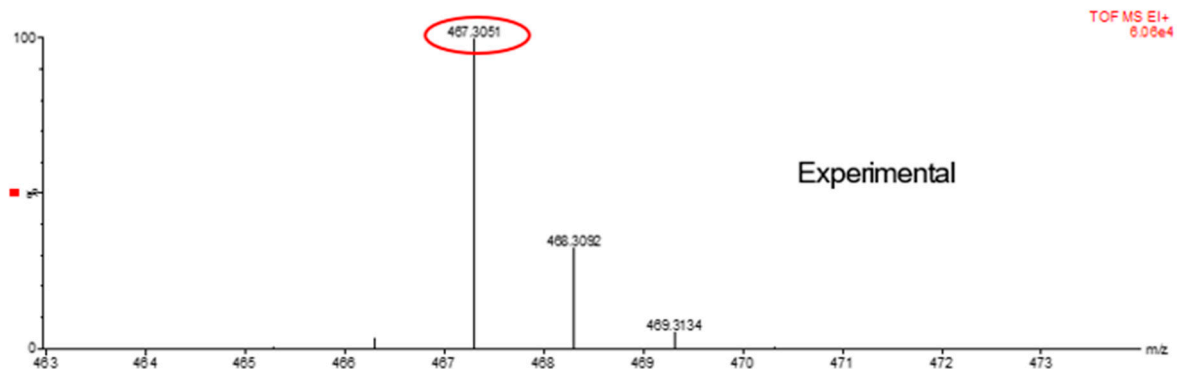



## 8 H nmr

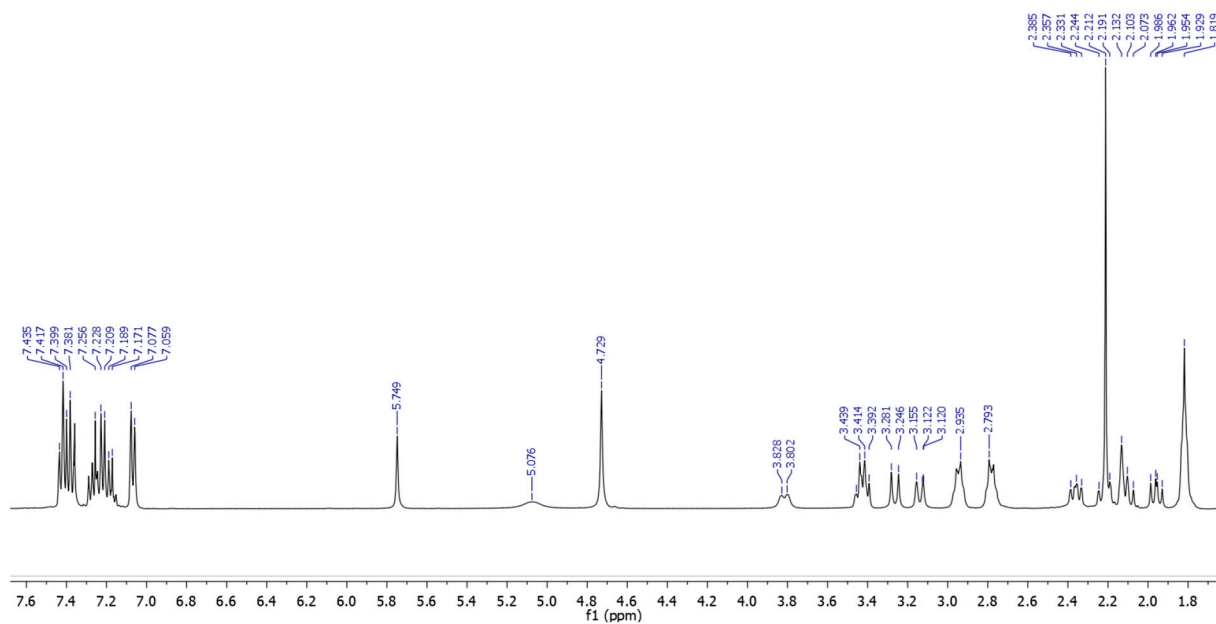

## 8 C nmr

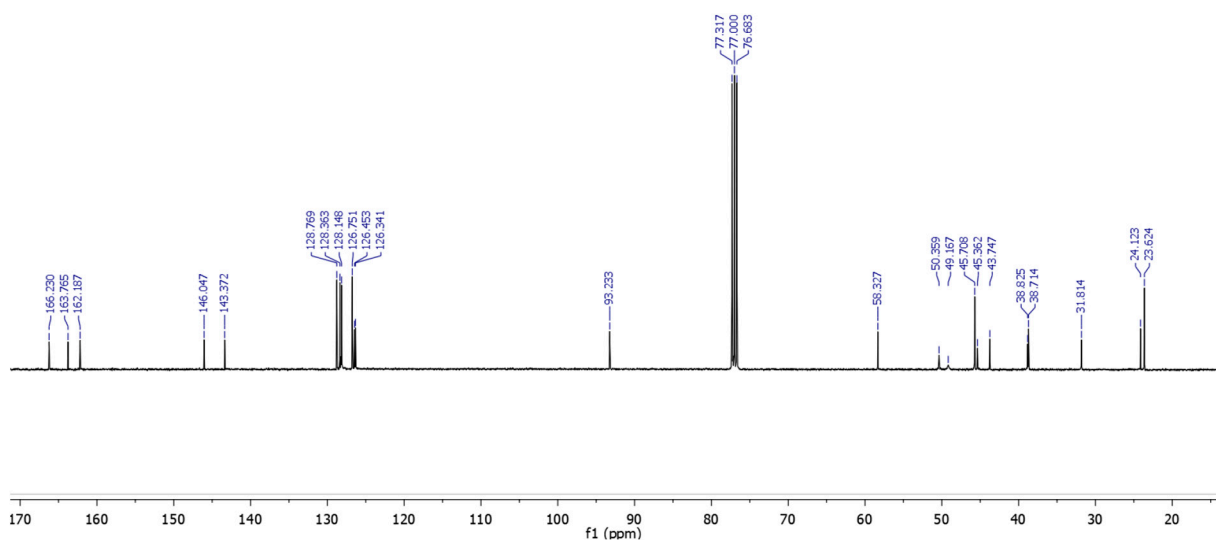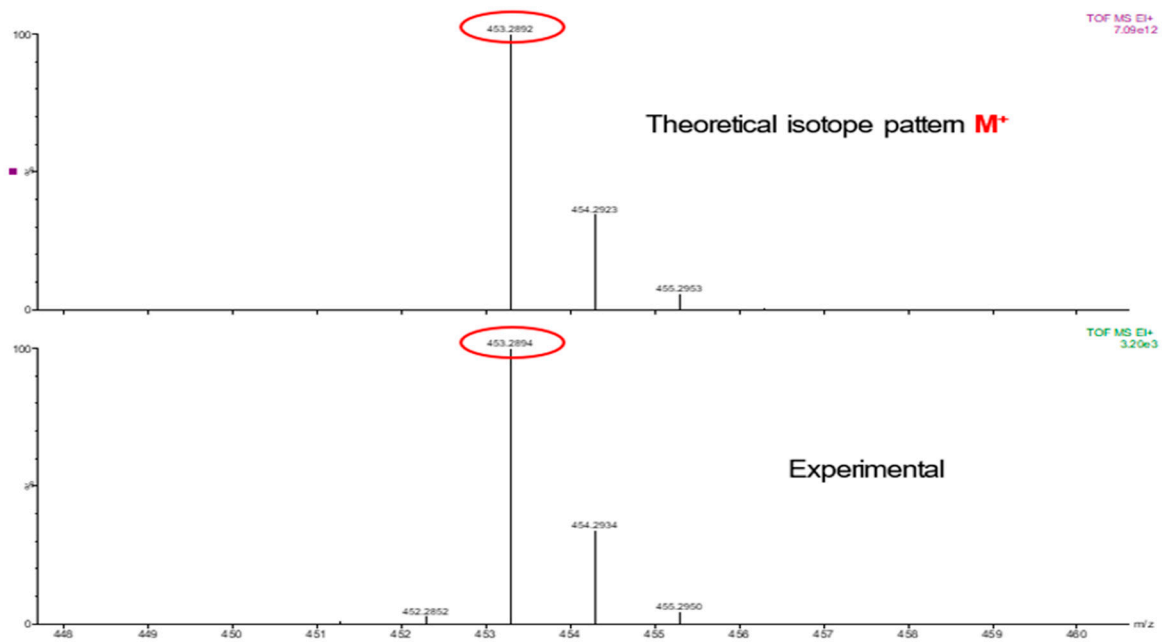

## 9 H nmr

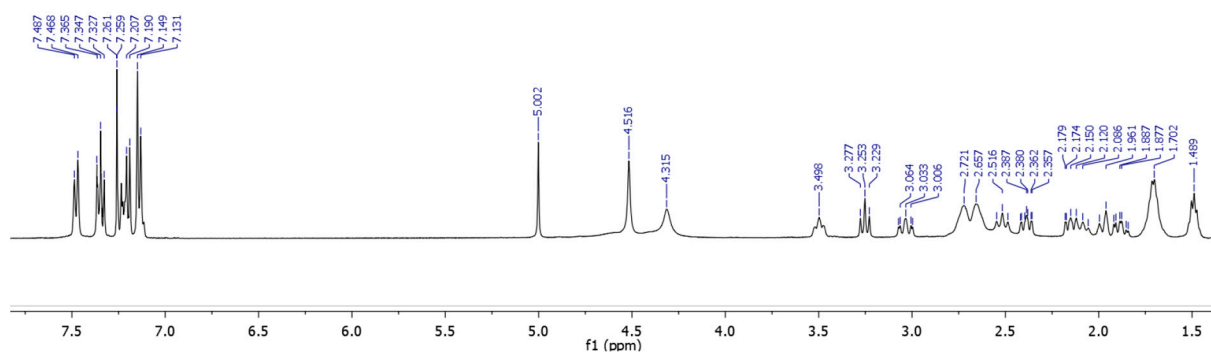

## 9 C nmr

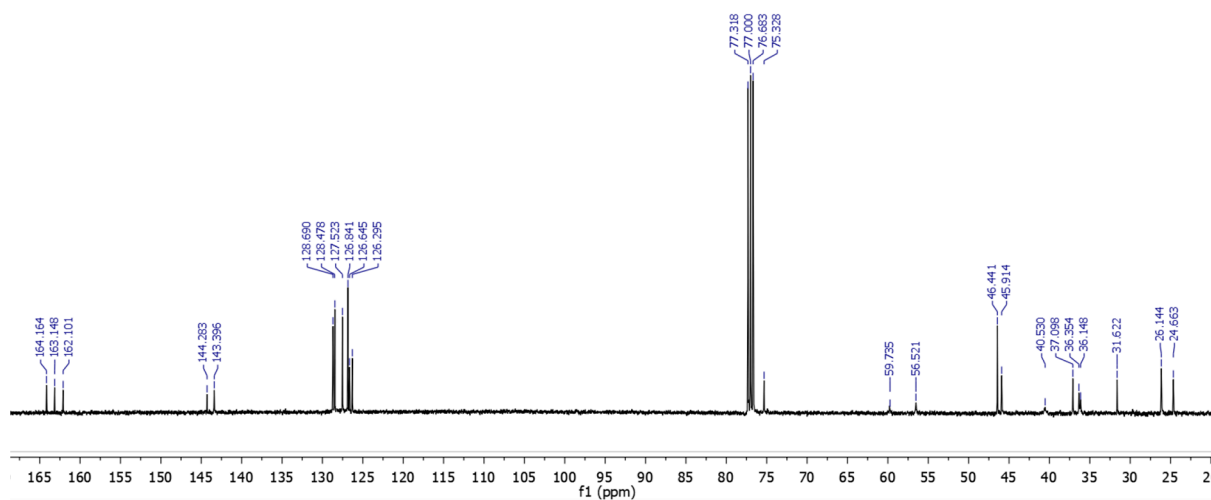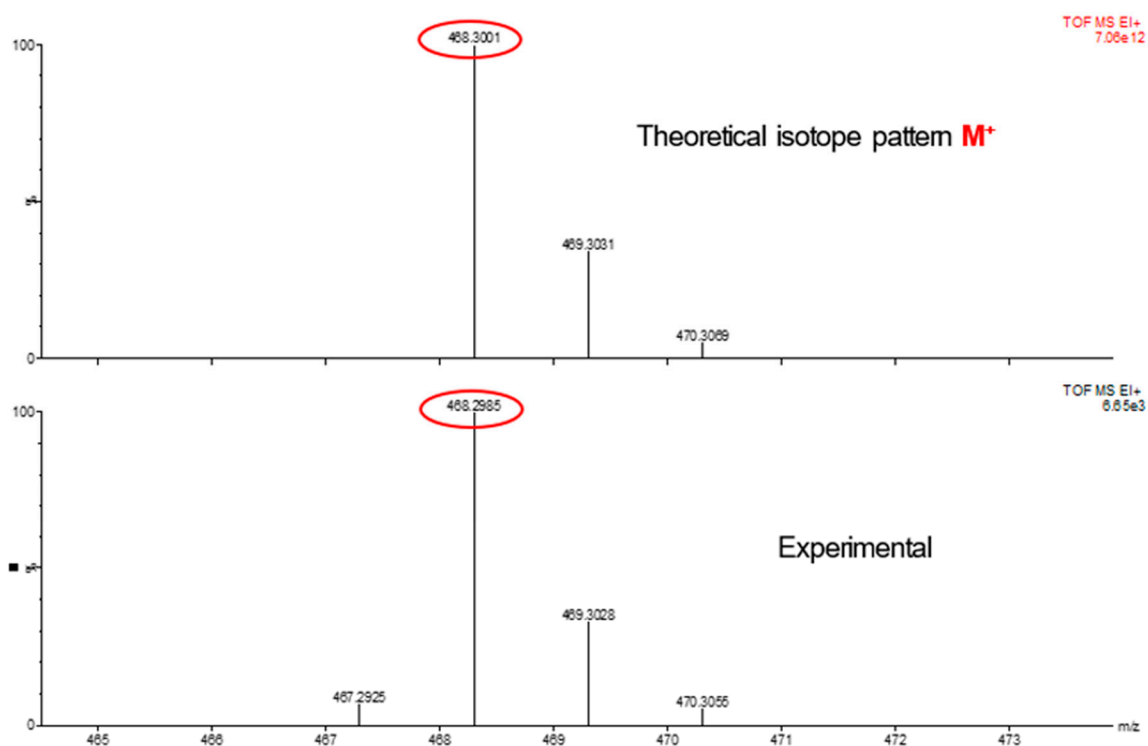

## 10 H nmr

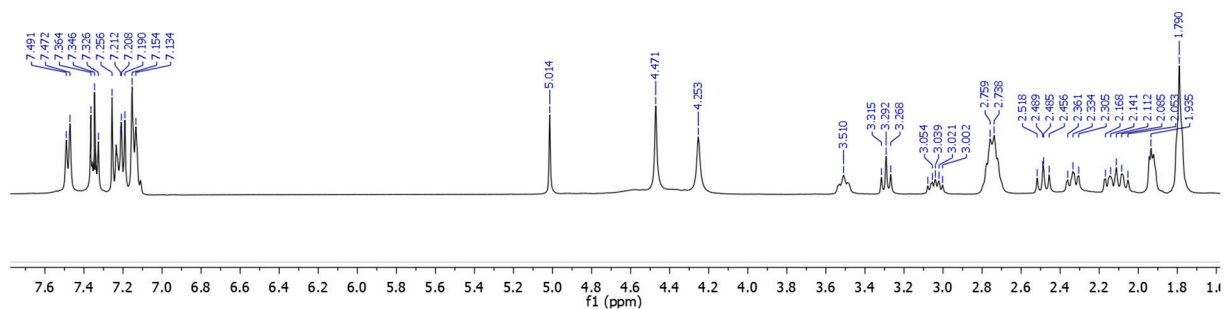

## 10 C nmr

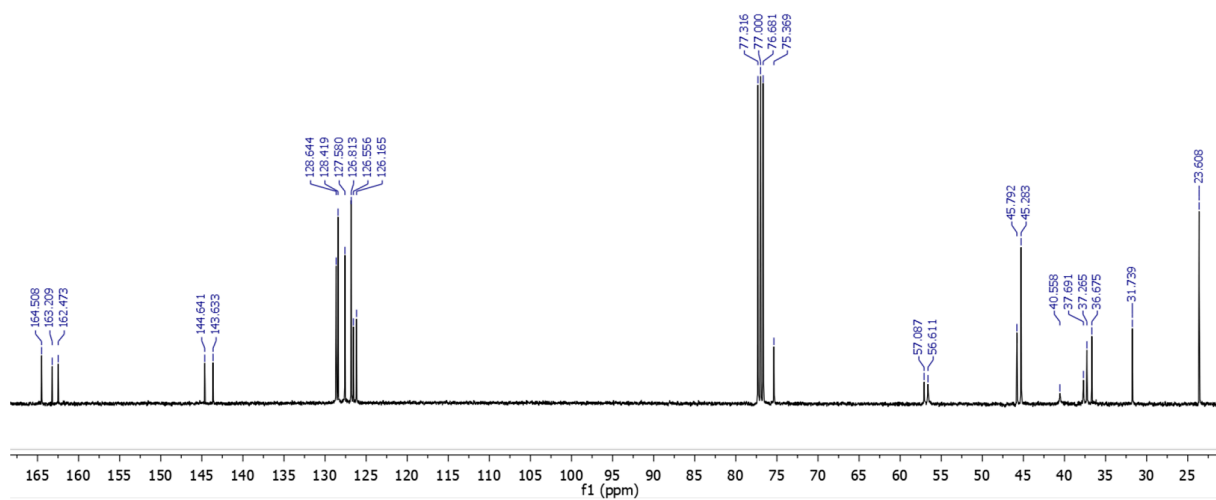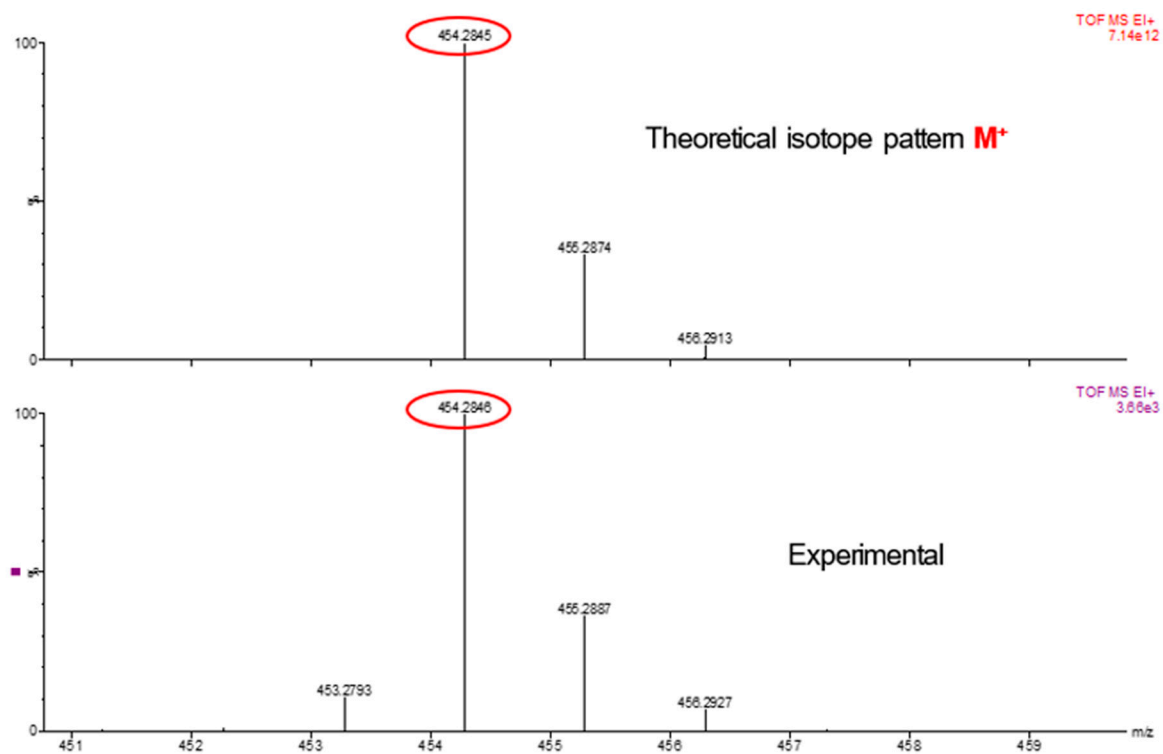

## 11 H nmr

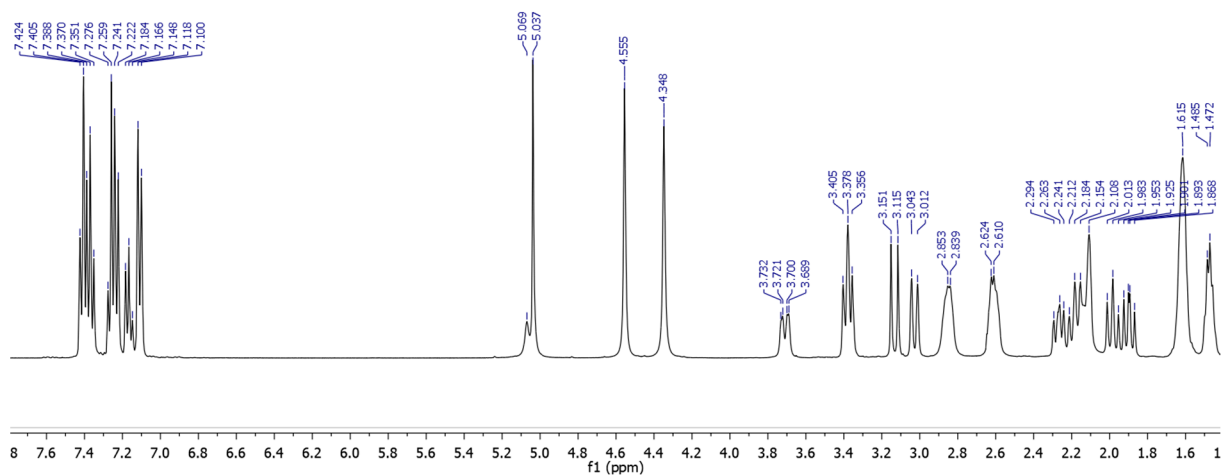

## 11 C nmr

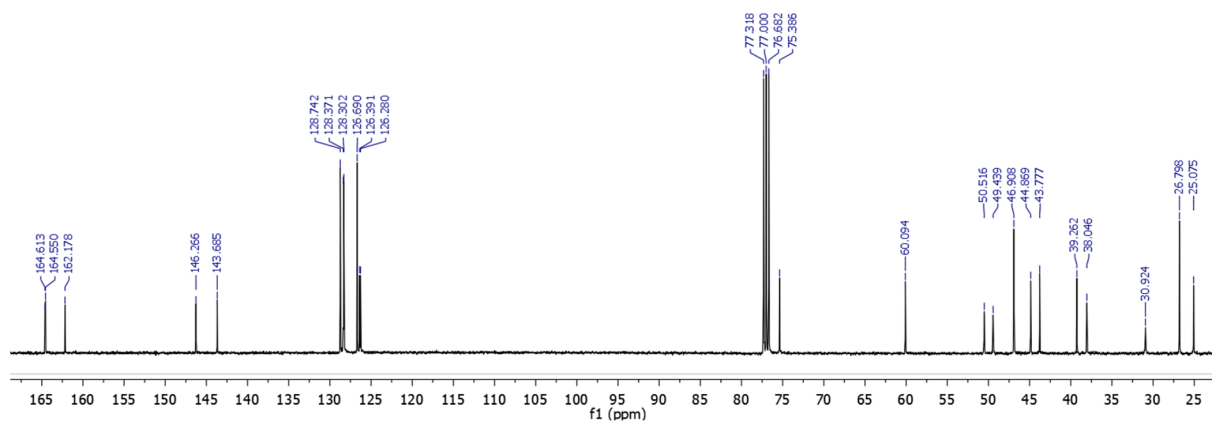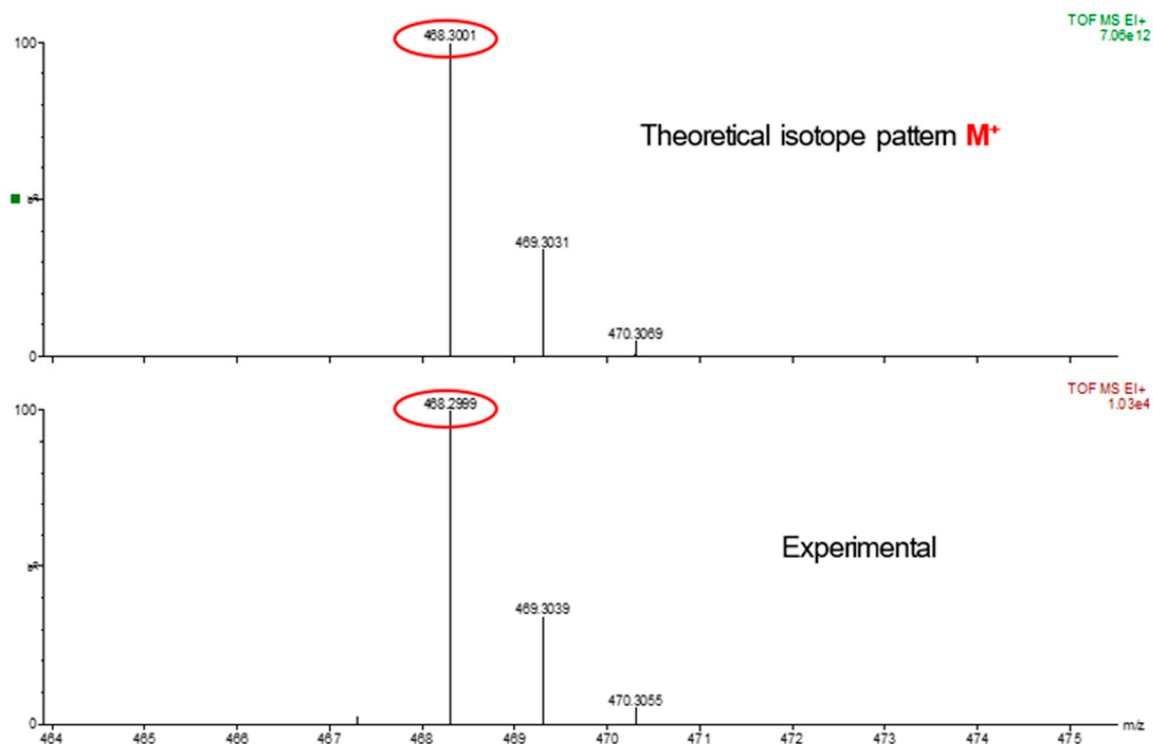

## 12 H nmr

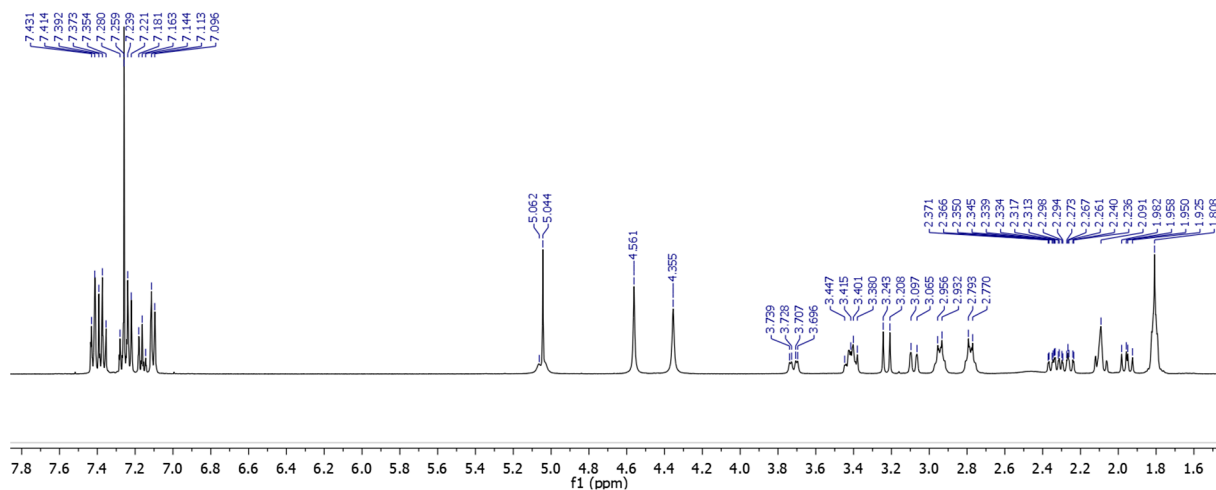

## 12 C nmr

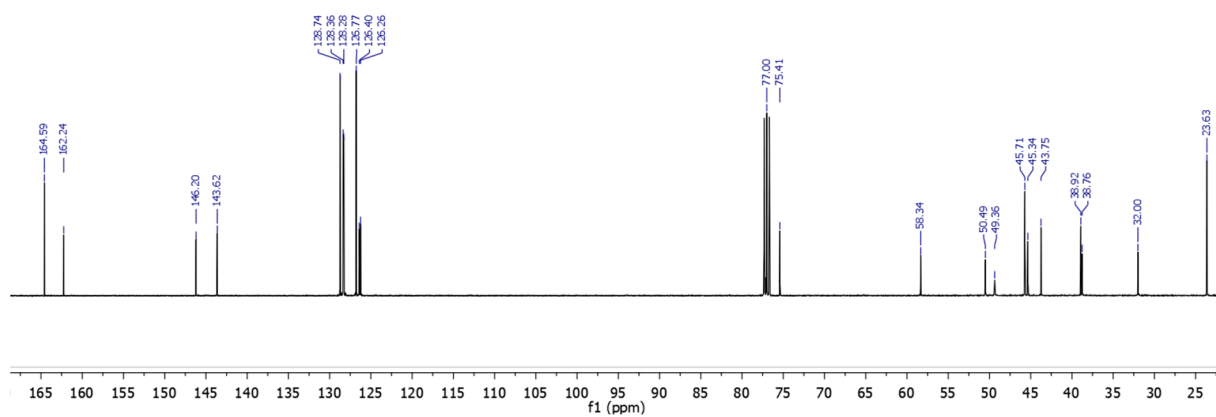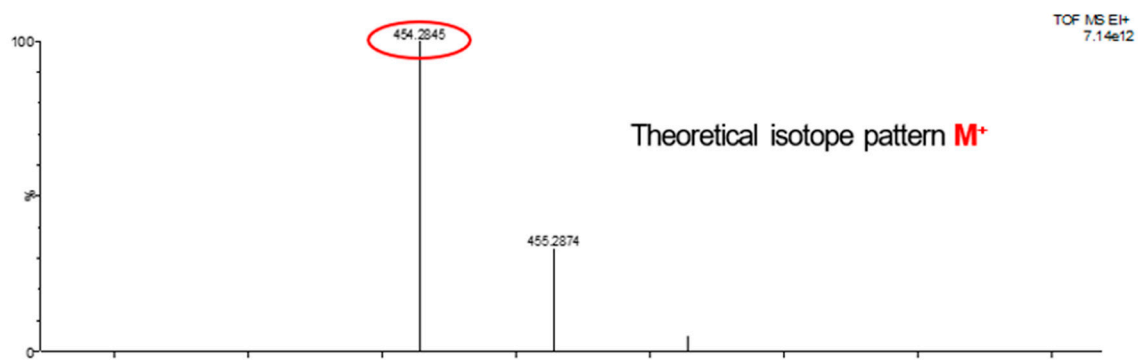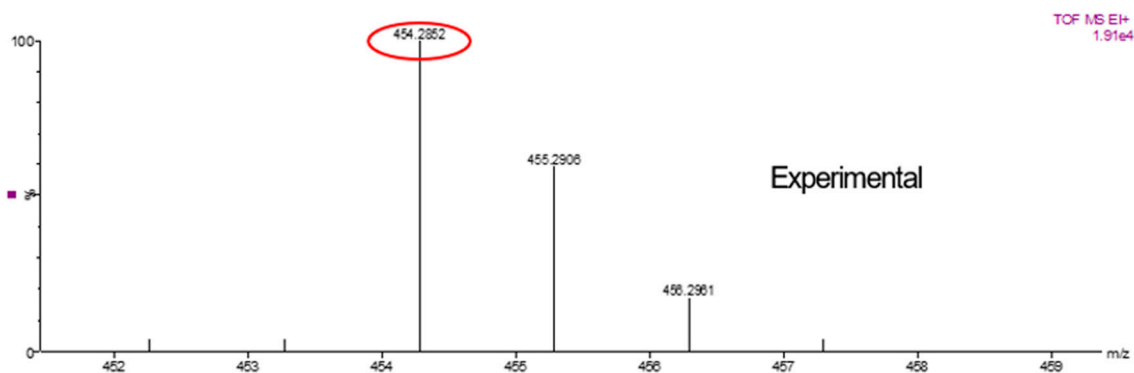

## <sup>13</sup>H nmr

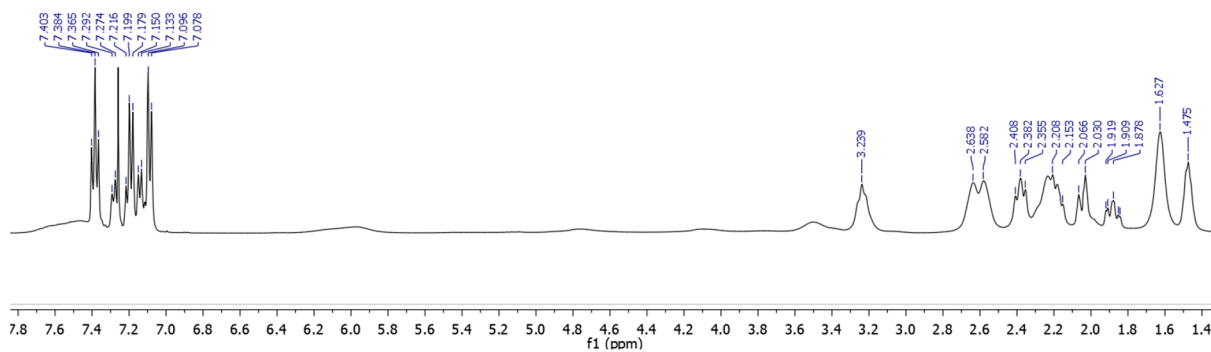

## <sup>13</sup>C nmr

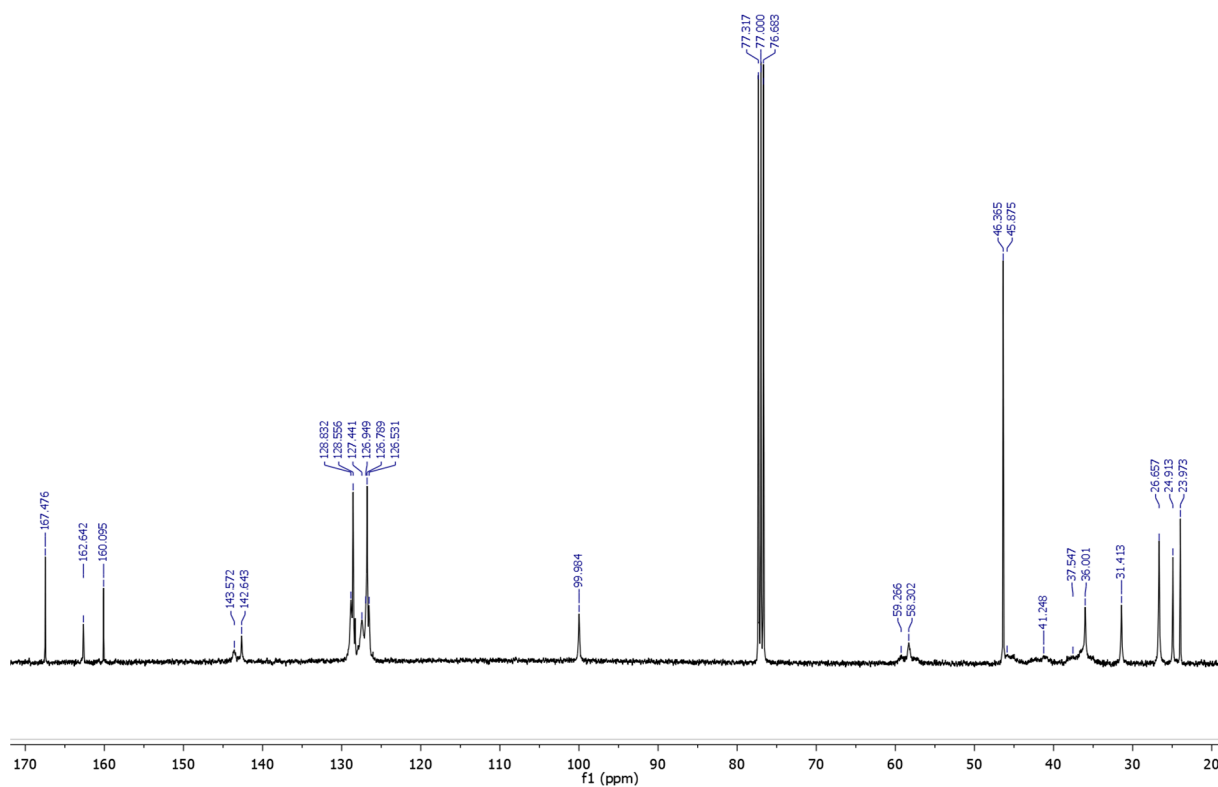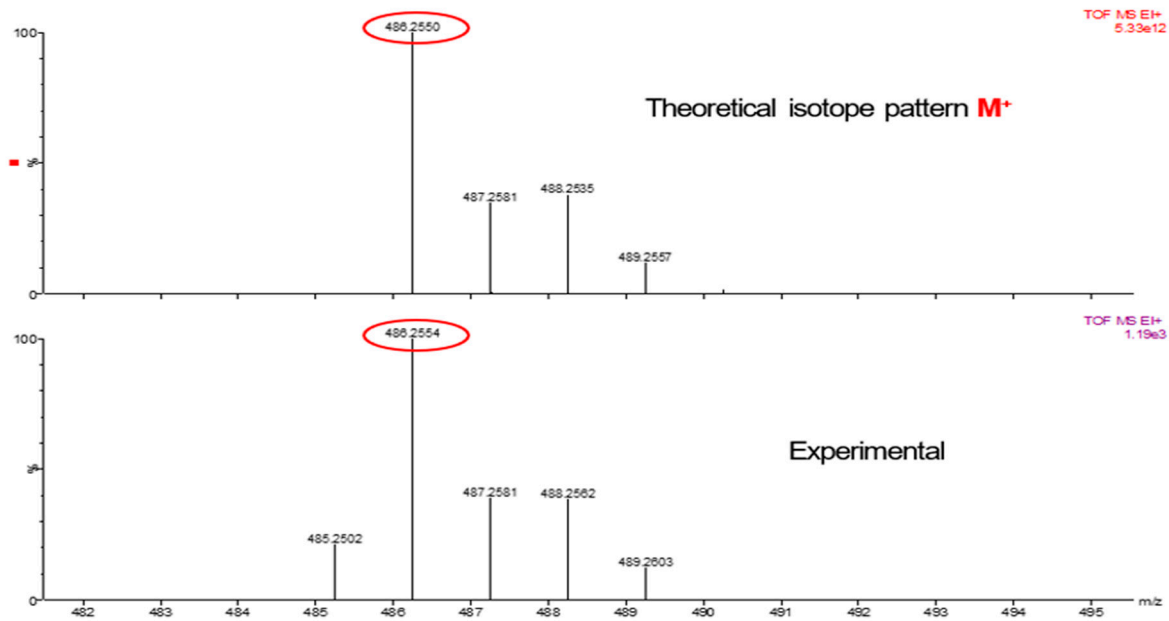

## 14 H nmr

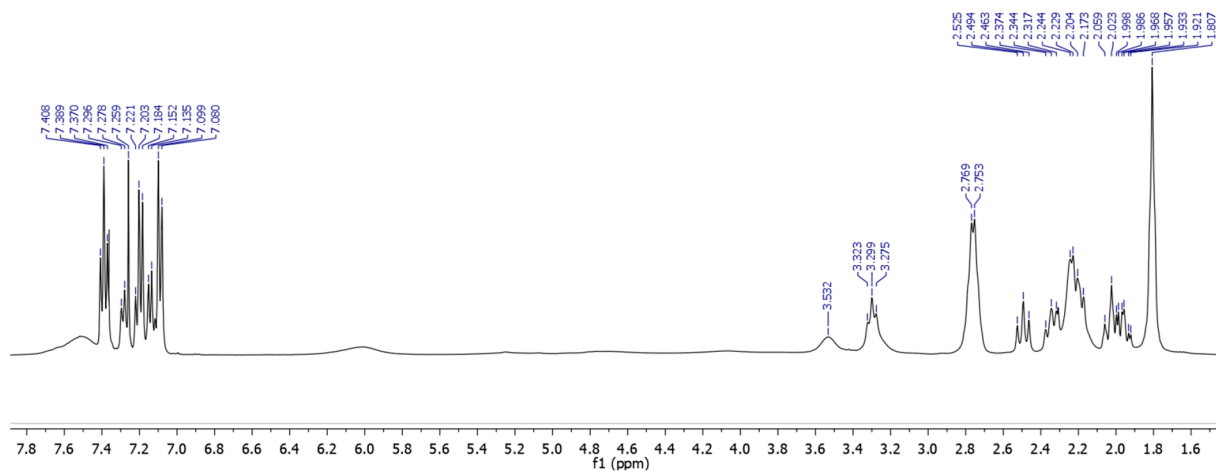

## 14 C nmr

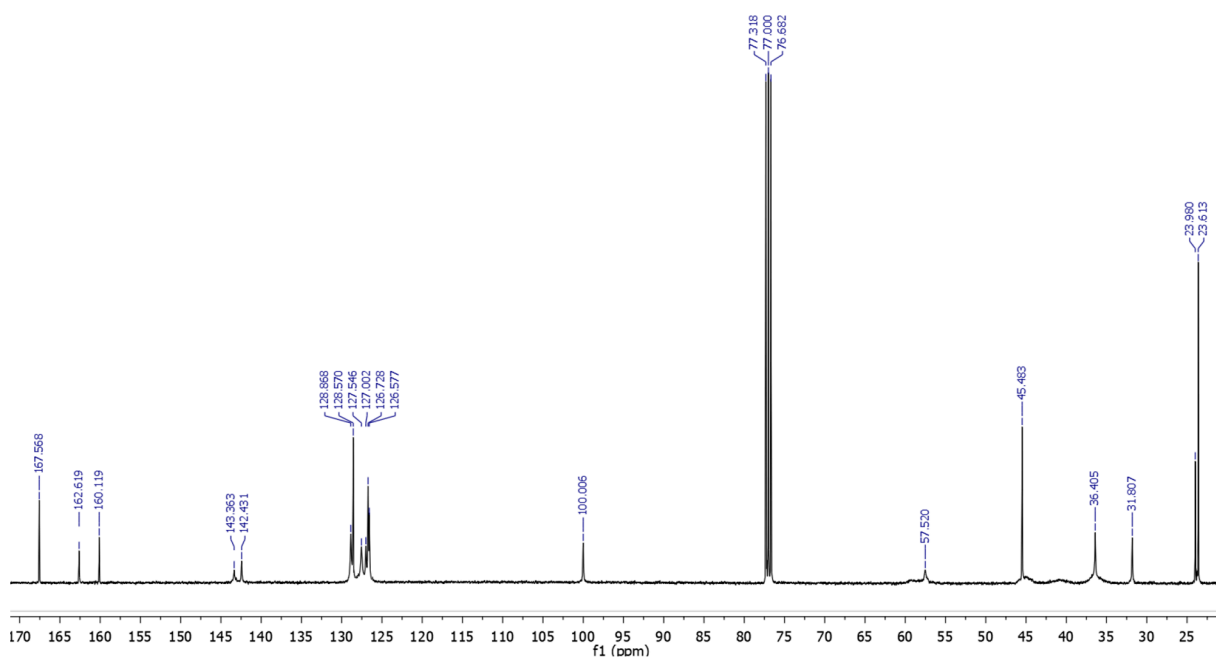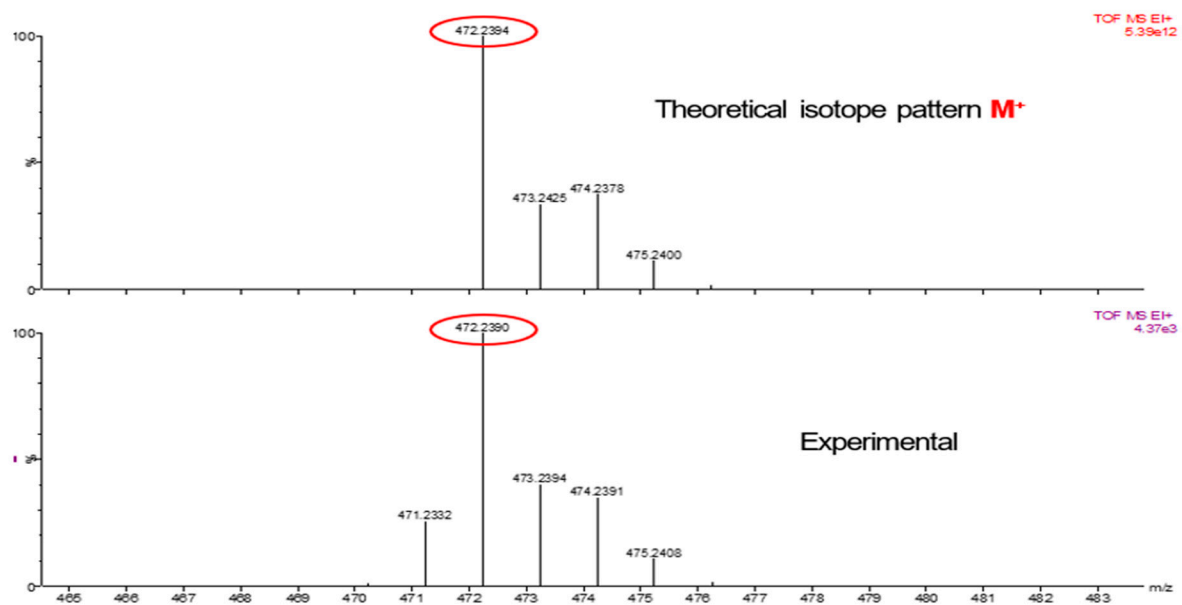

## 15 H nmr

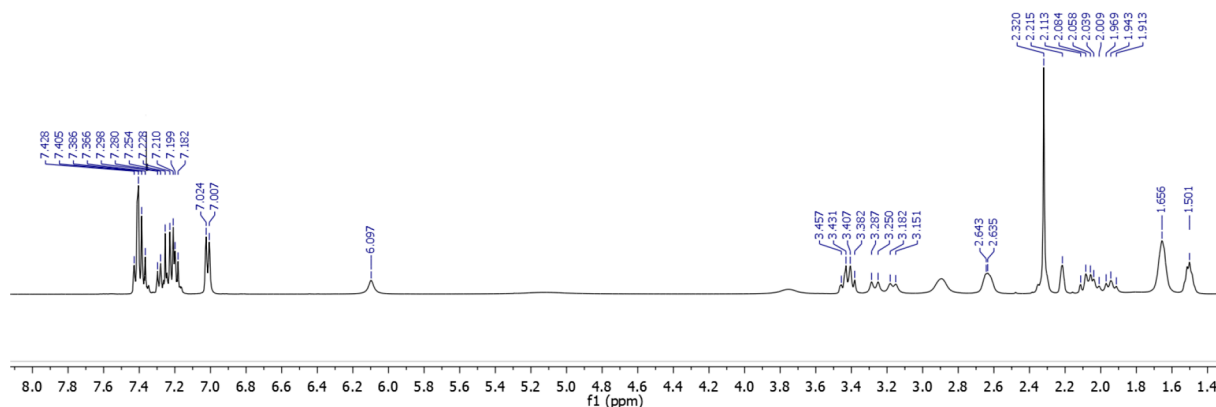

## 15 C nmr

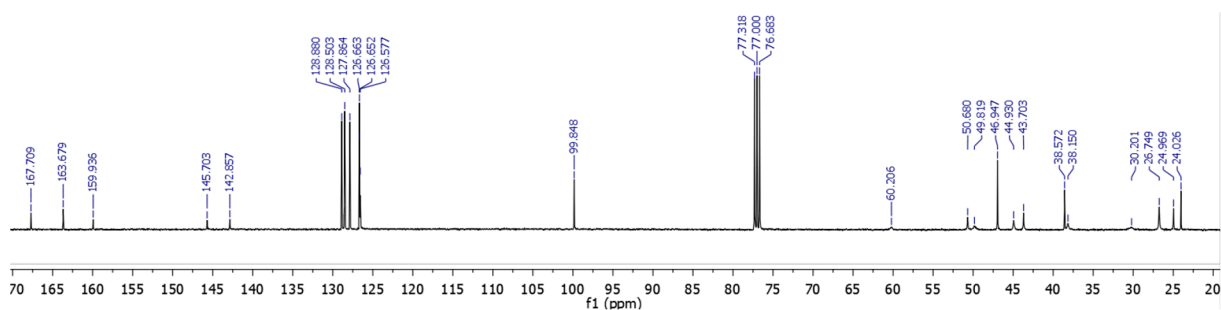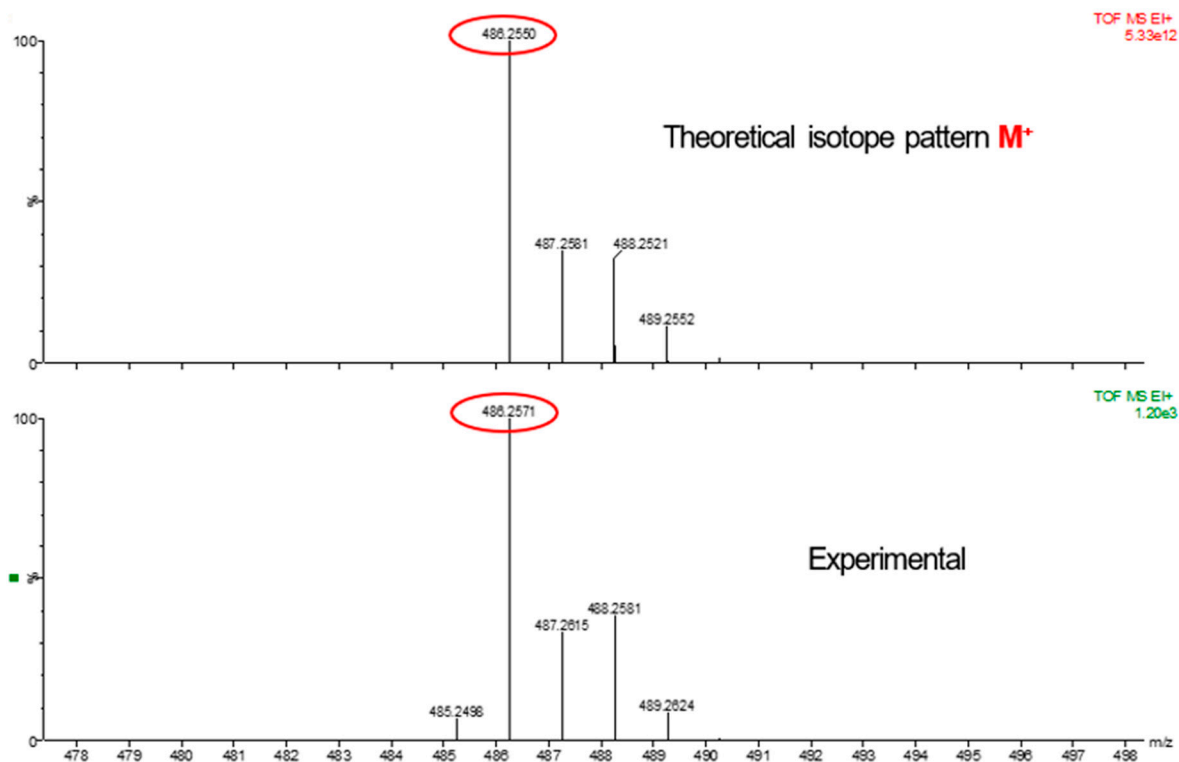



## 16 H nmr

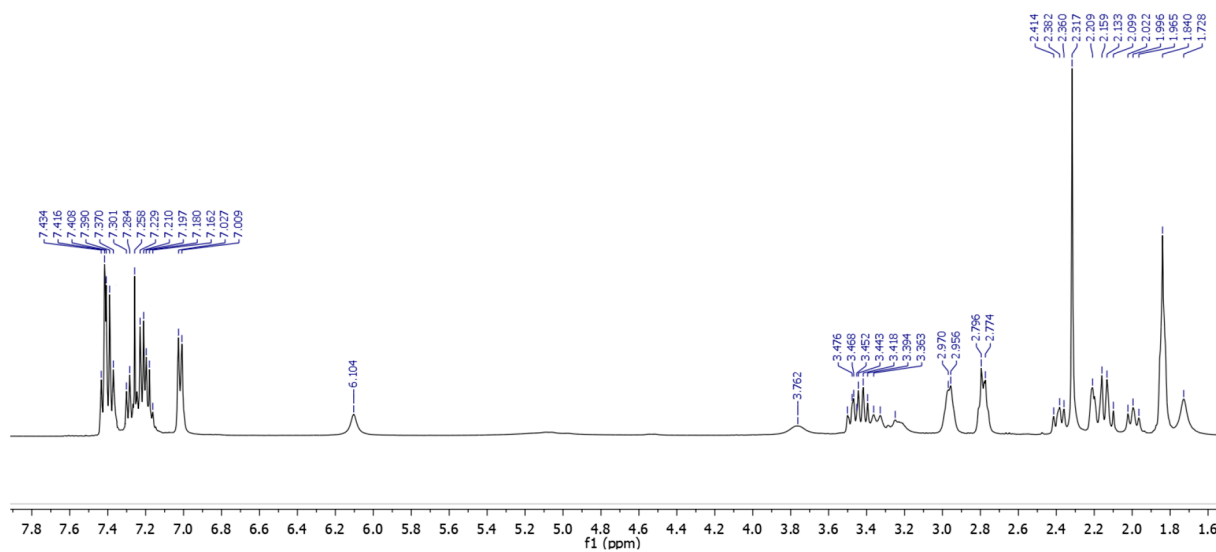

## 16 C nmr

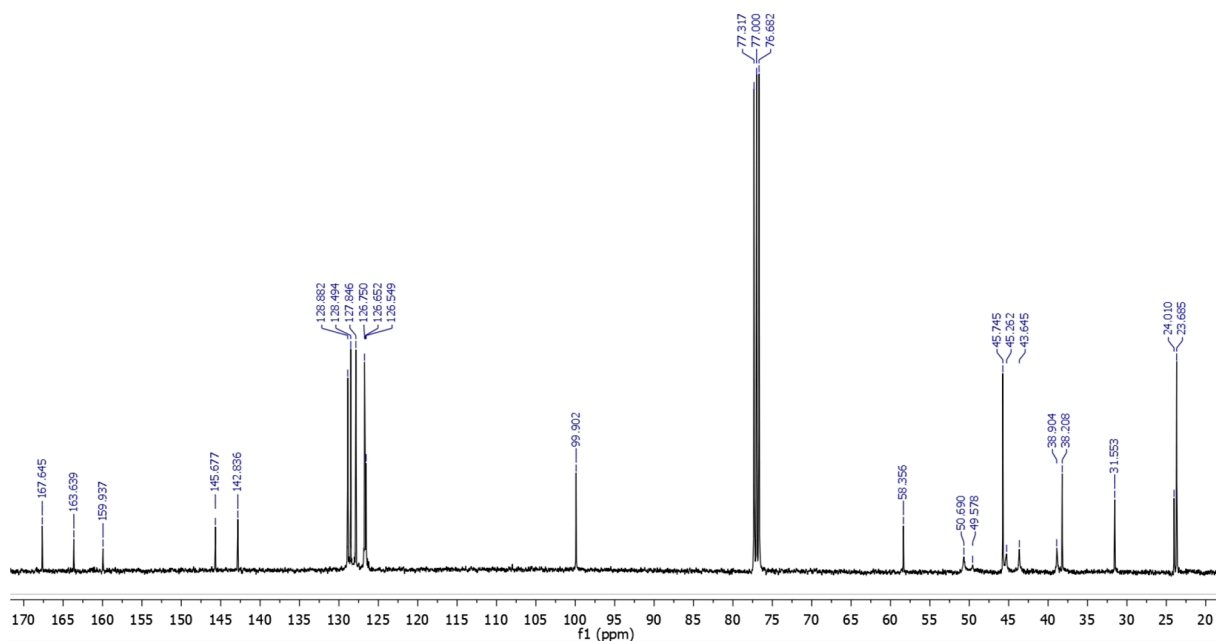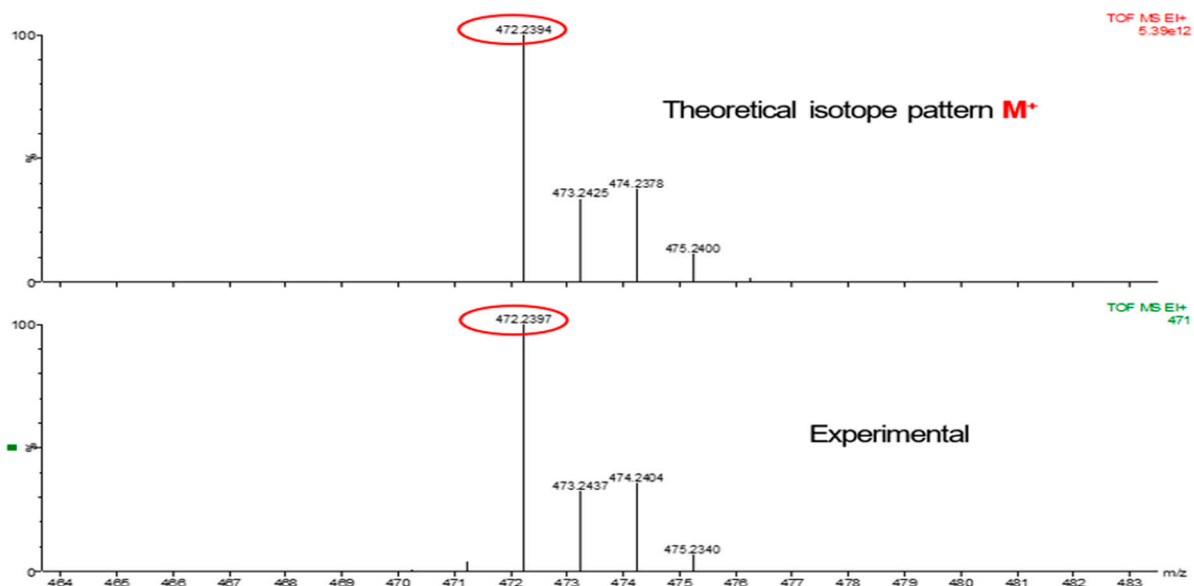

## 17 H nmr

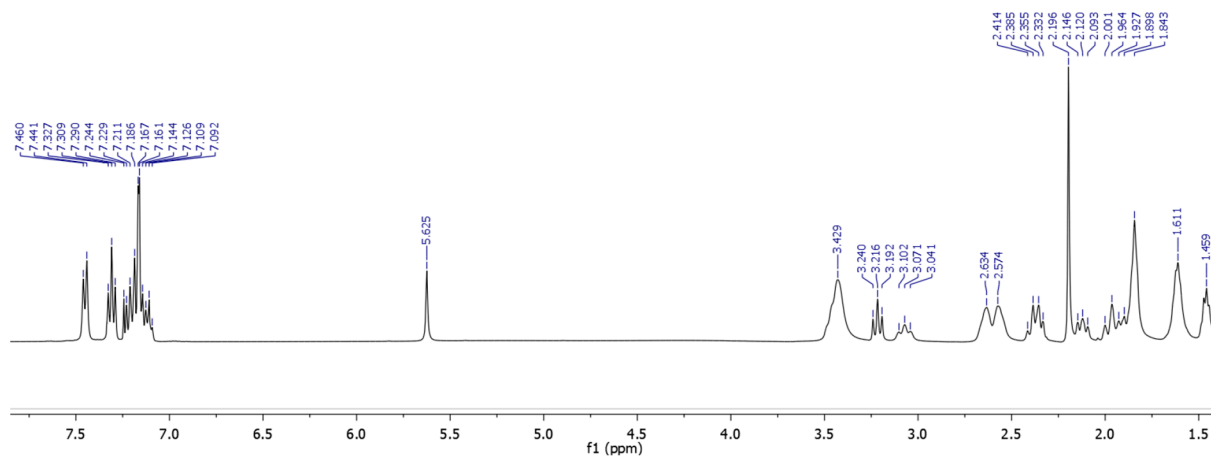

## 17 C nmr

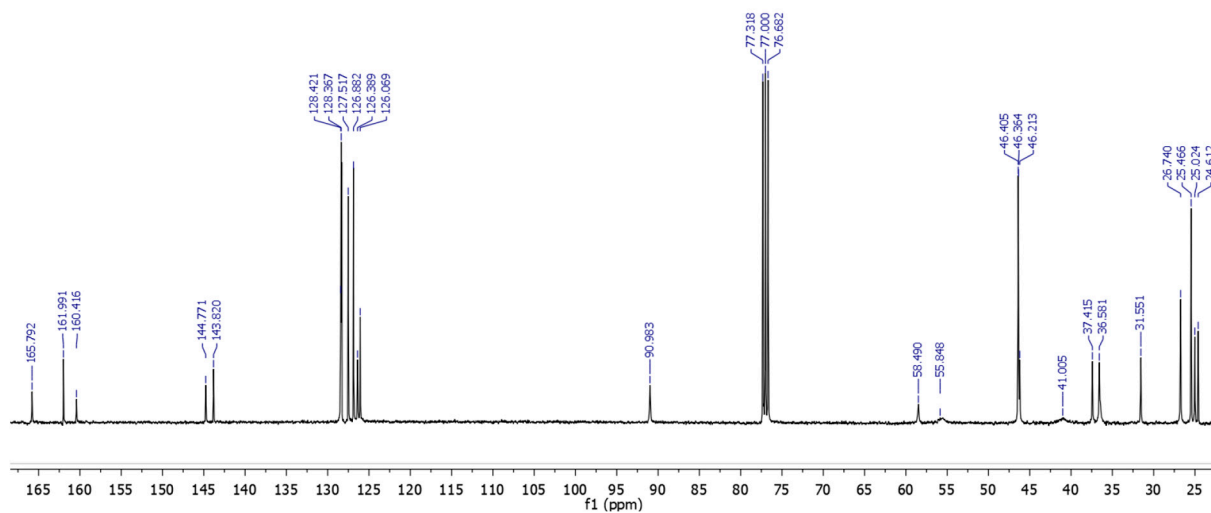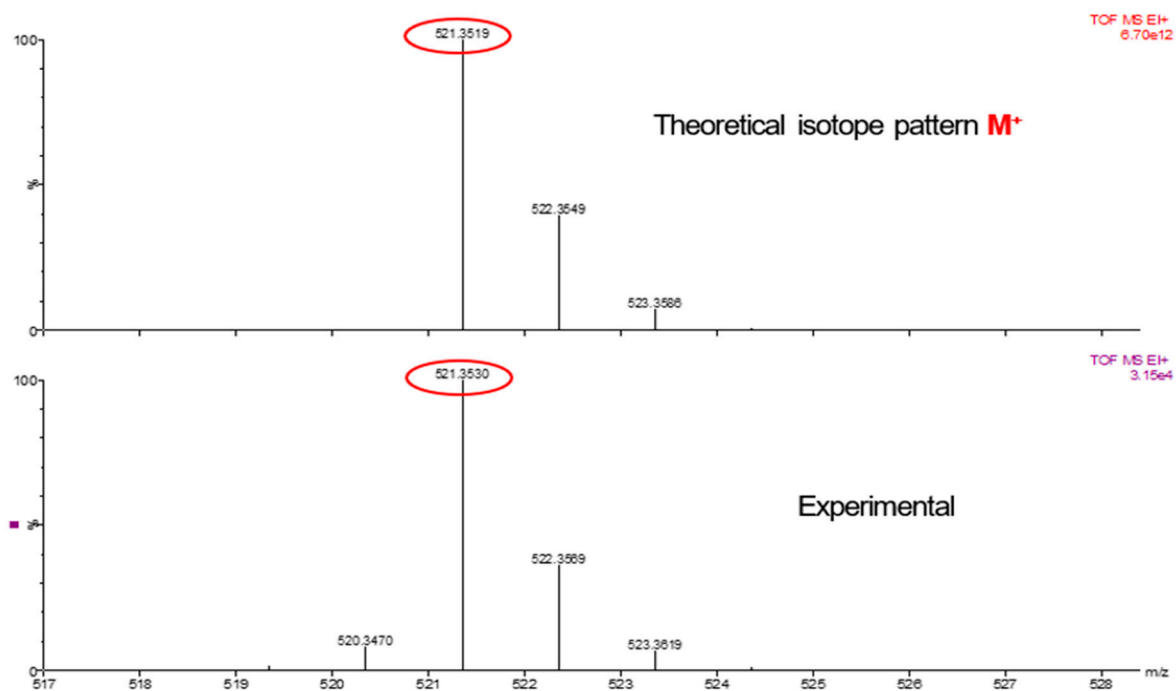

## 18 H nmr

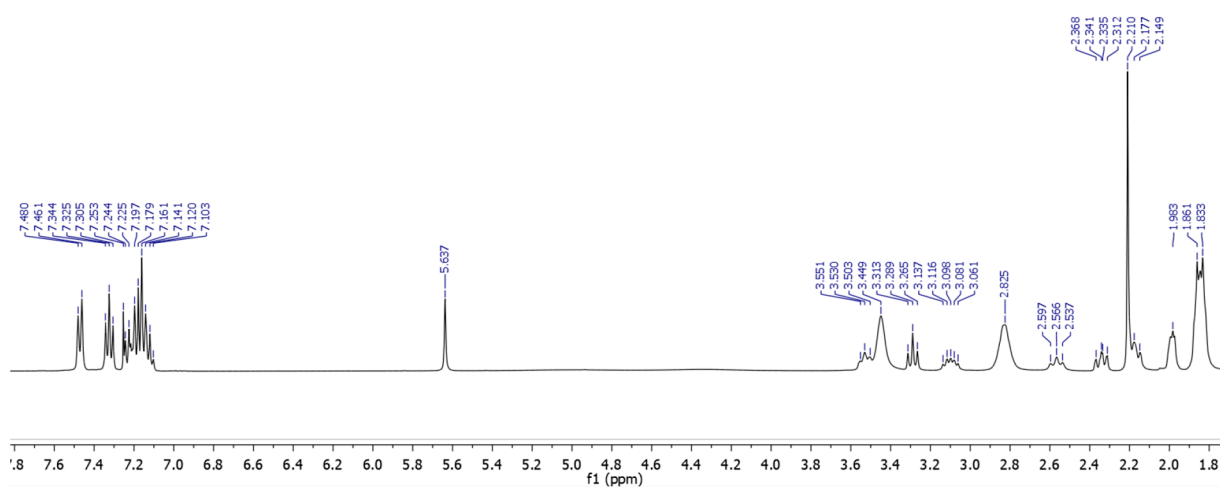

## 18 C nmr

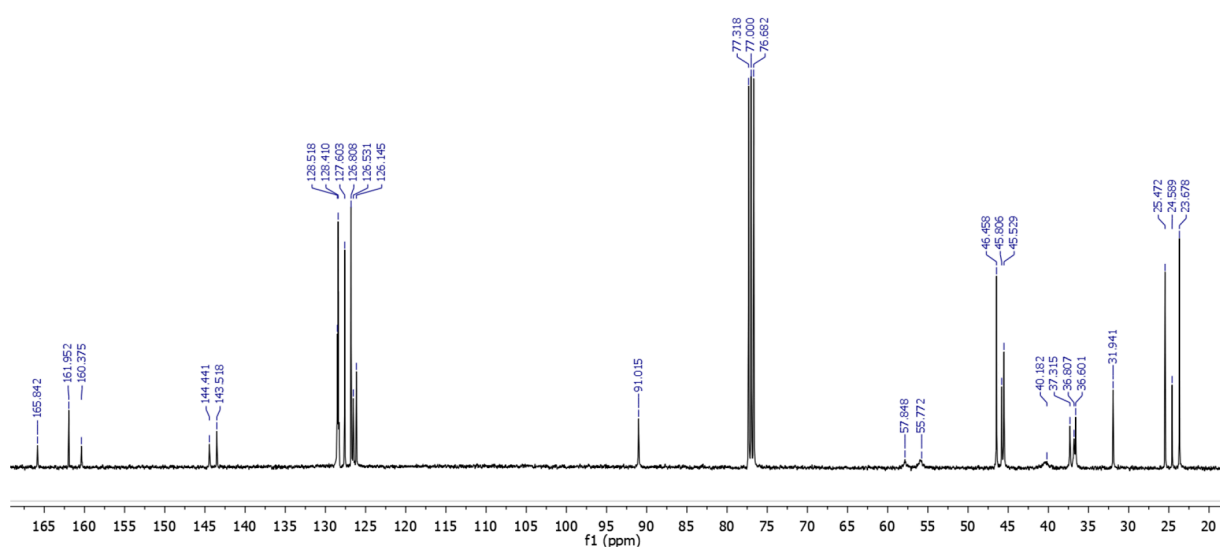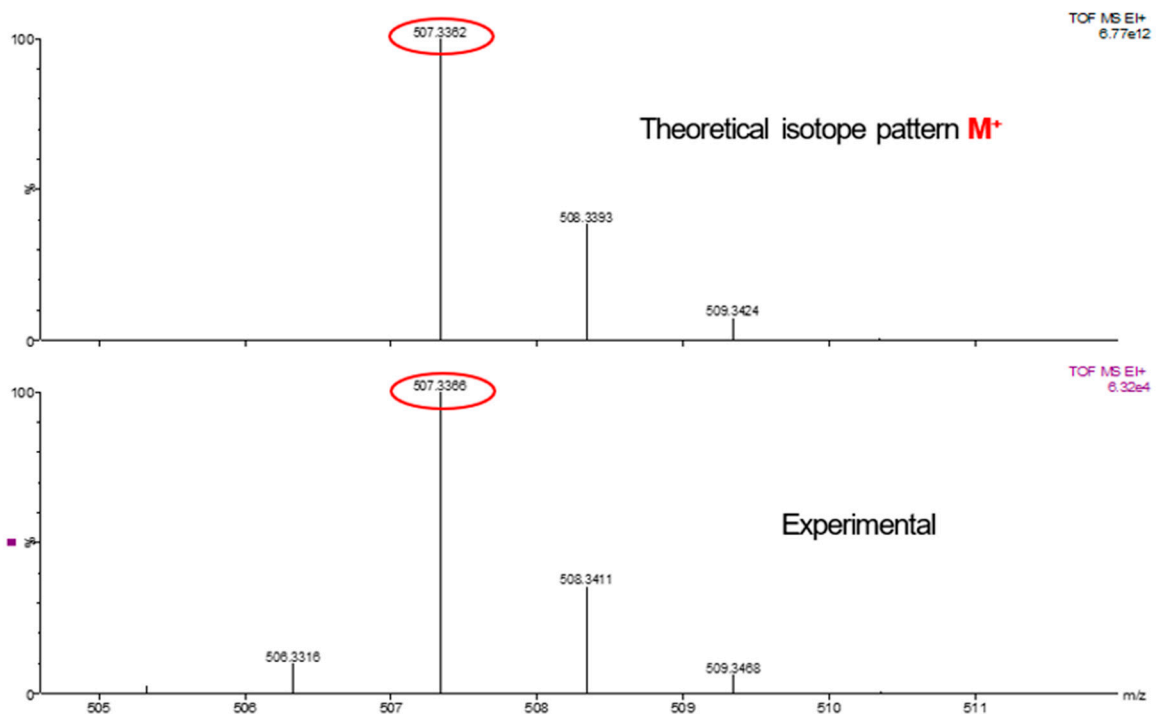

## 19 H nmr

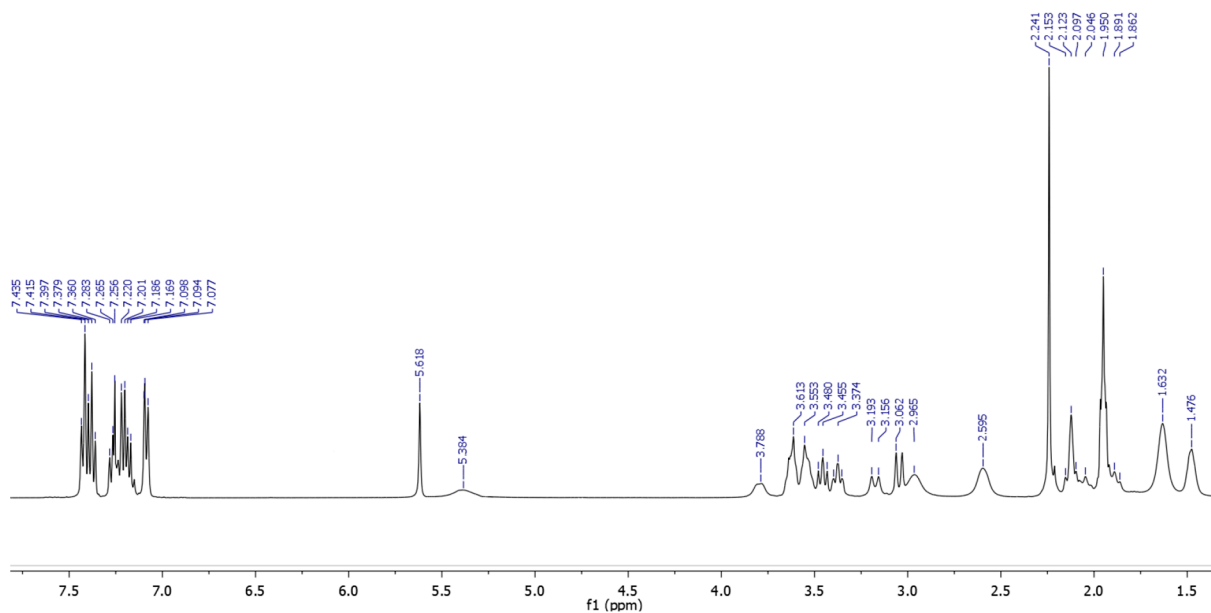

## 19 C nmr

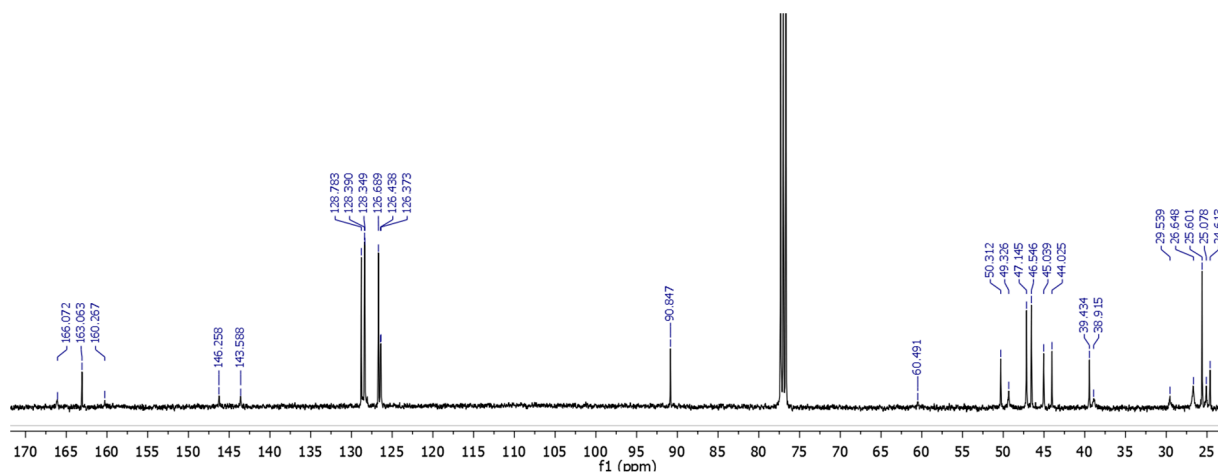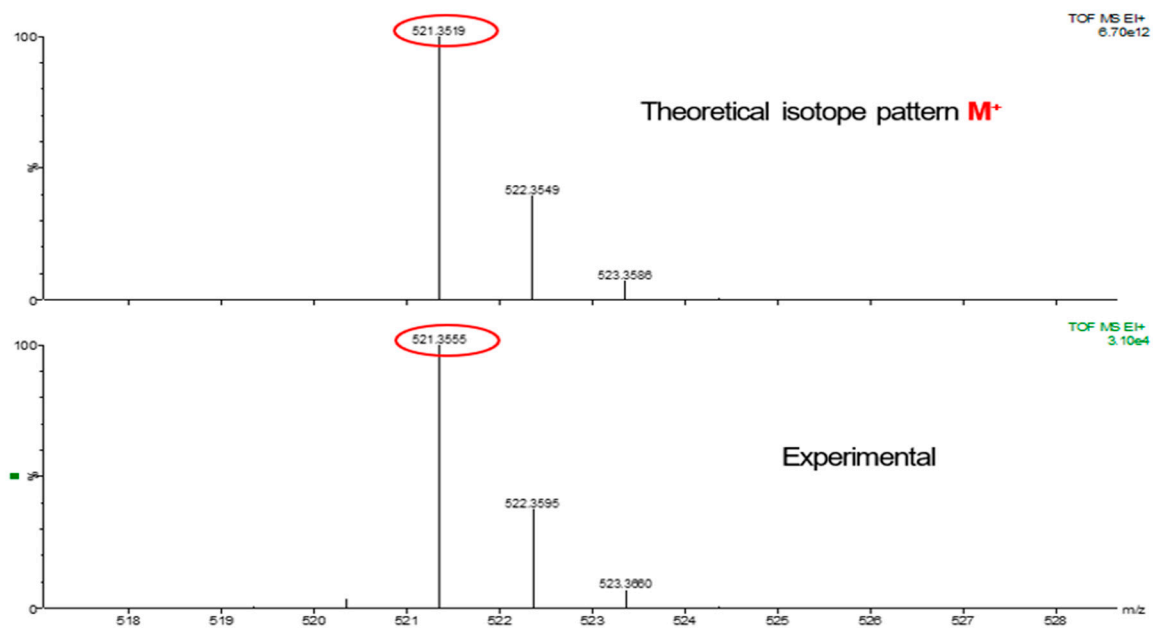

## 20 H nmr

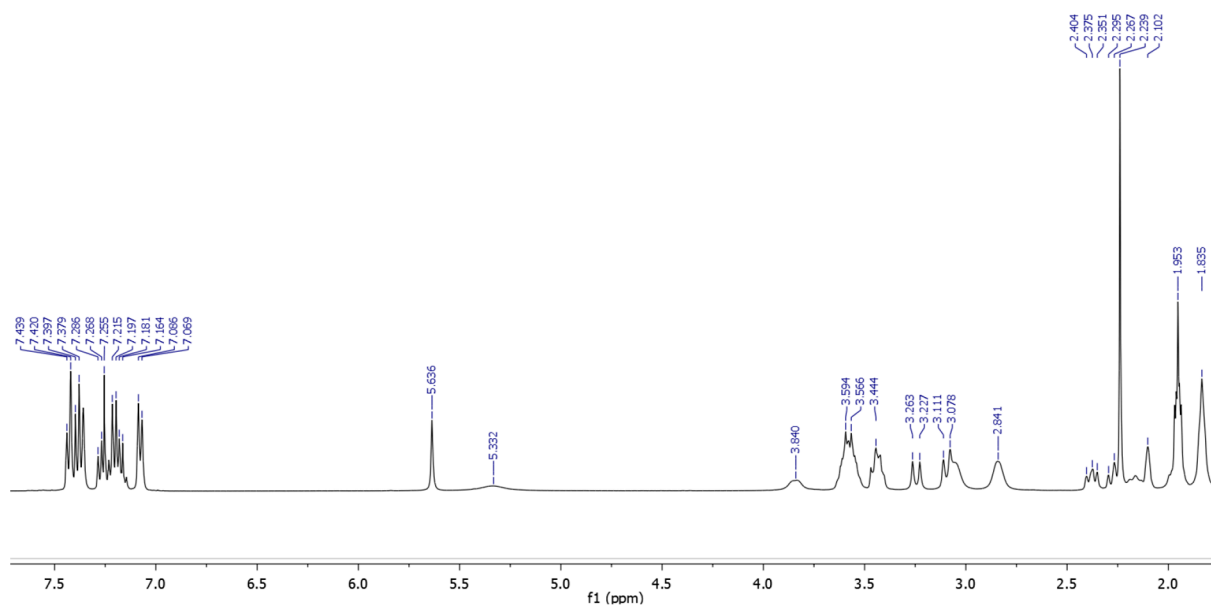

## 20 C nmr

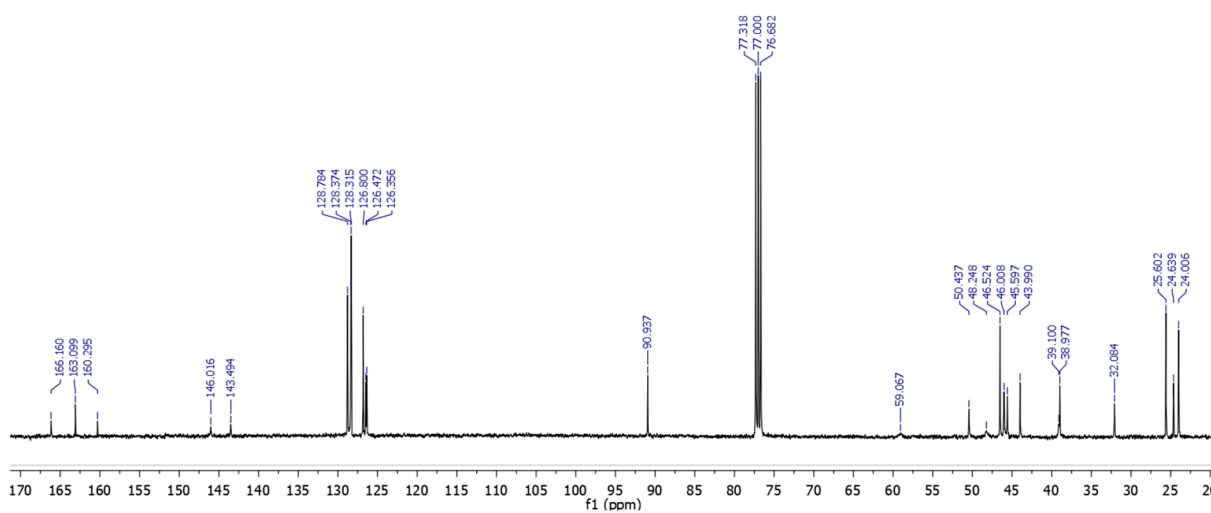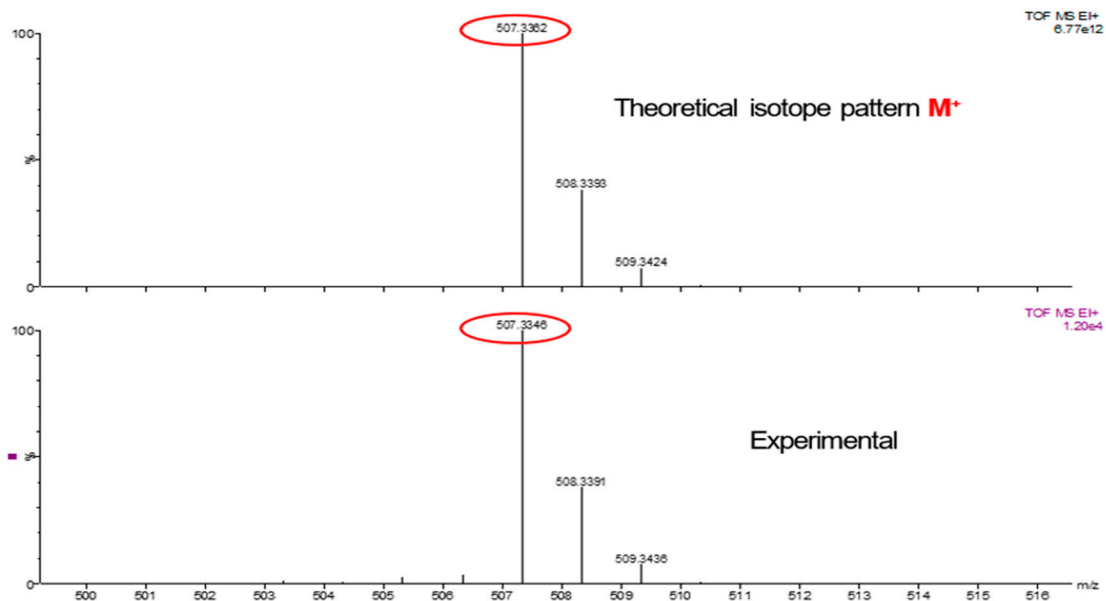

## <sup>1</sup>H NMR

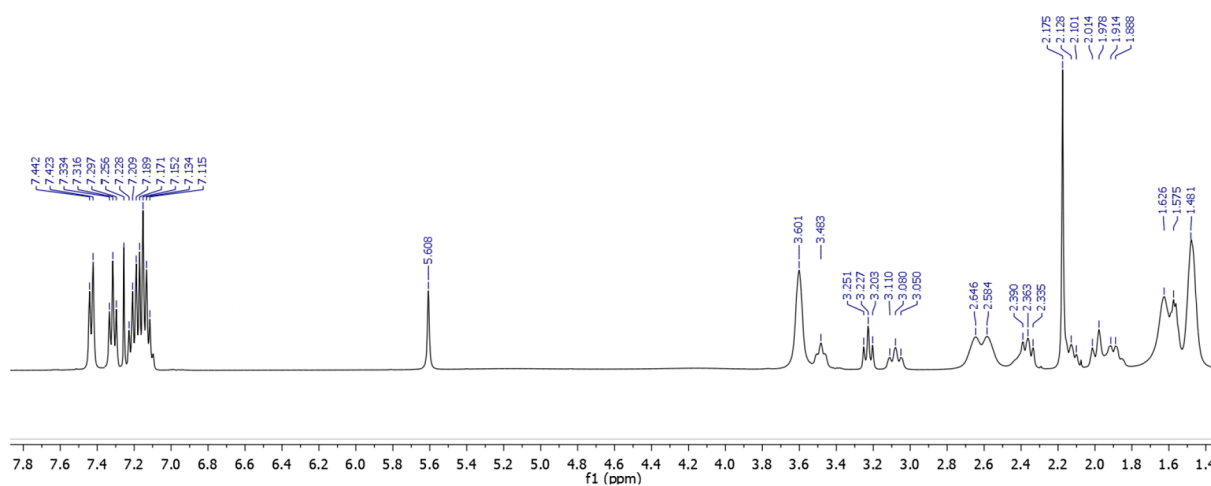

## <sup>13</sup>C NMR

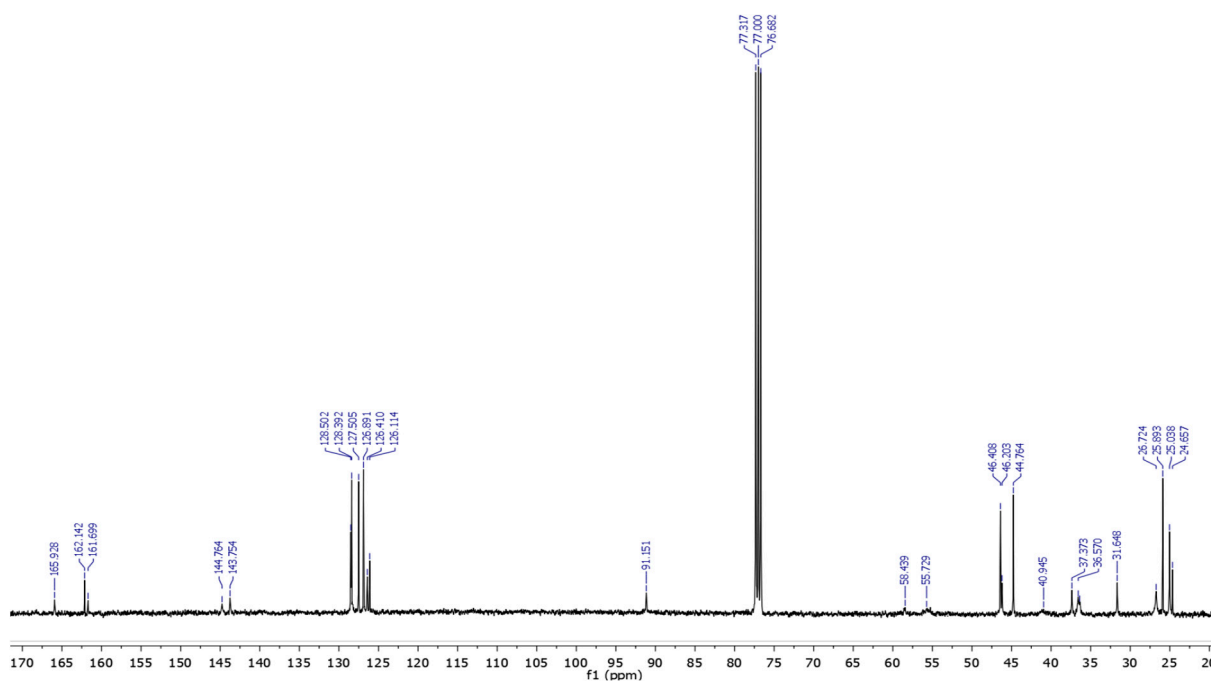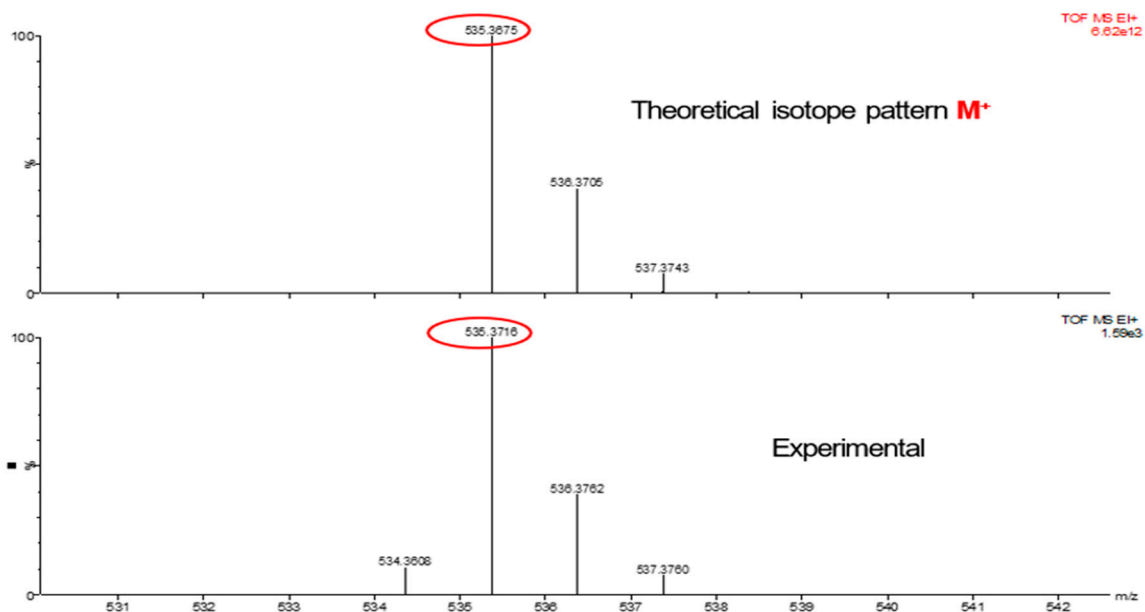

## 22 H nmr

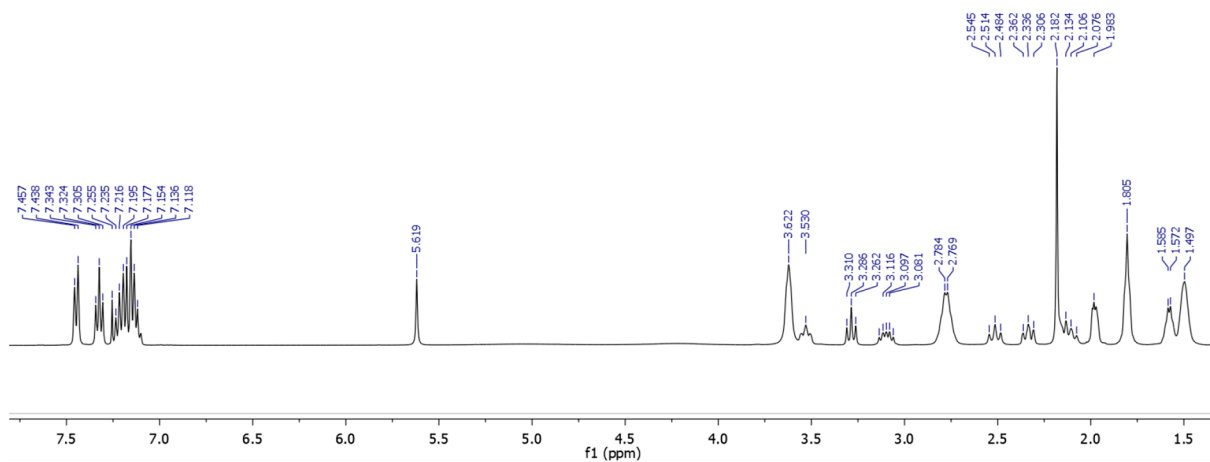

## 22 C nmr

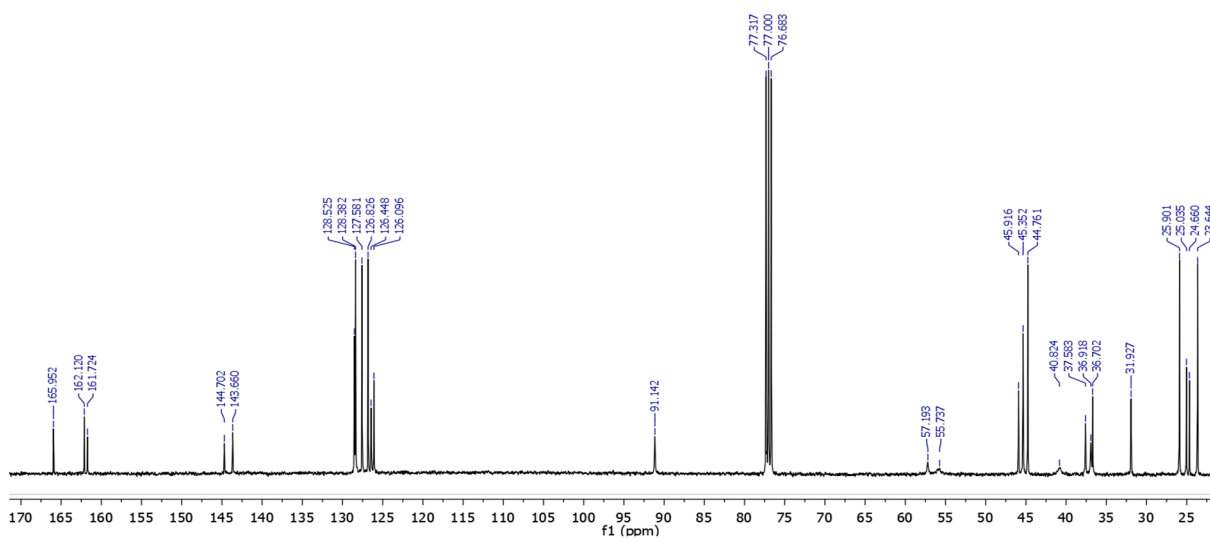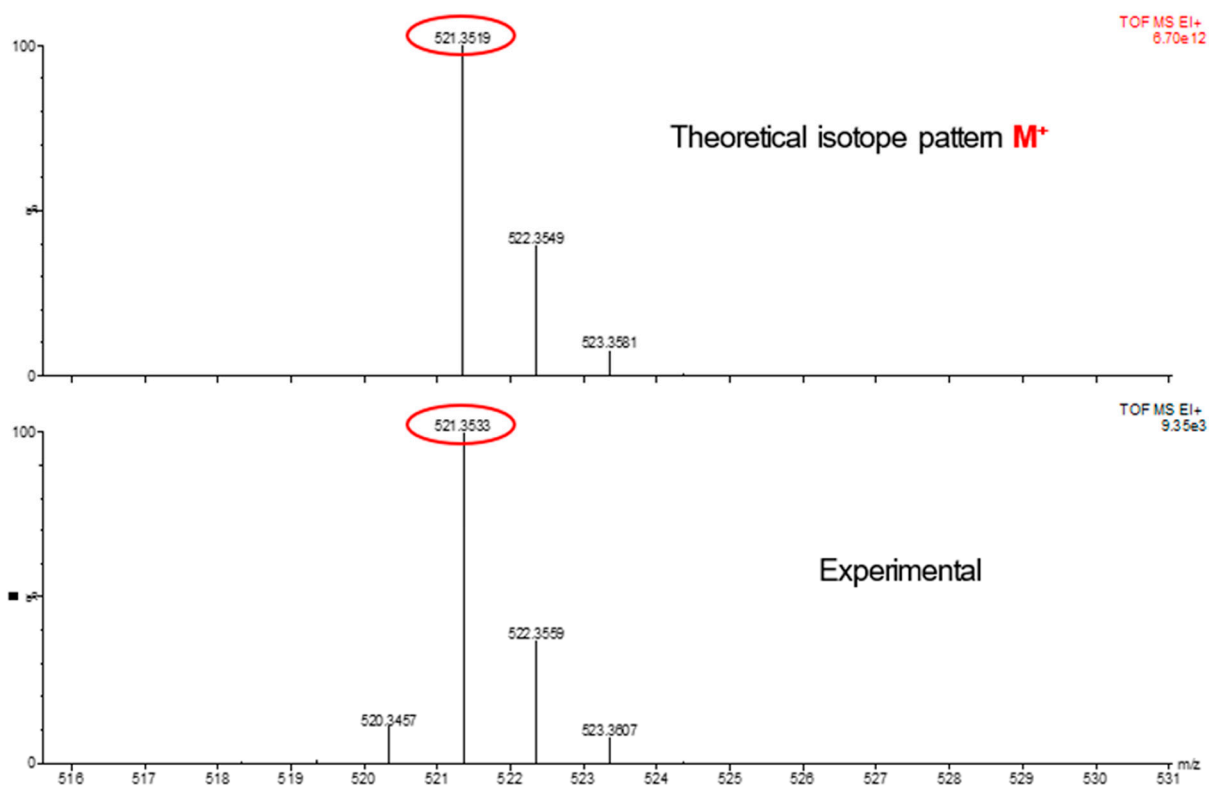

## 23 H nmr

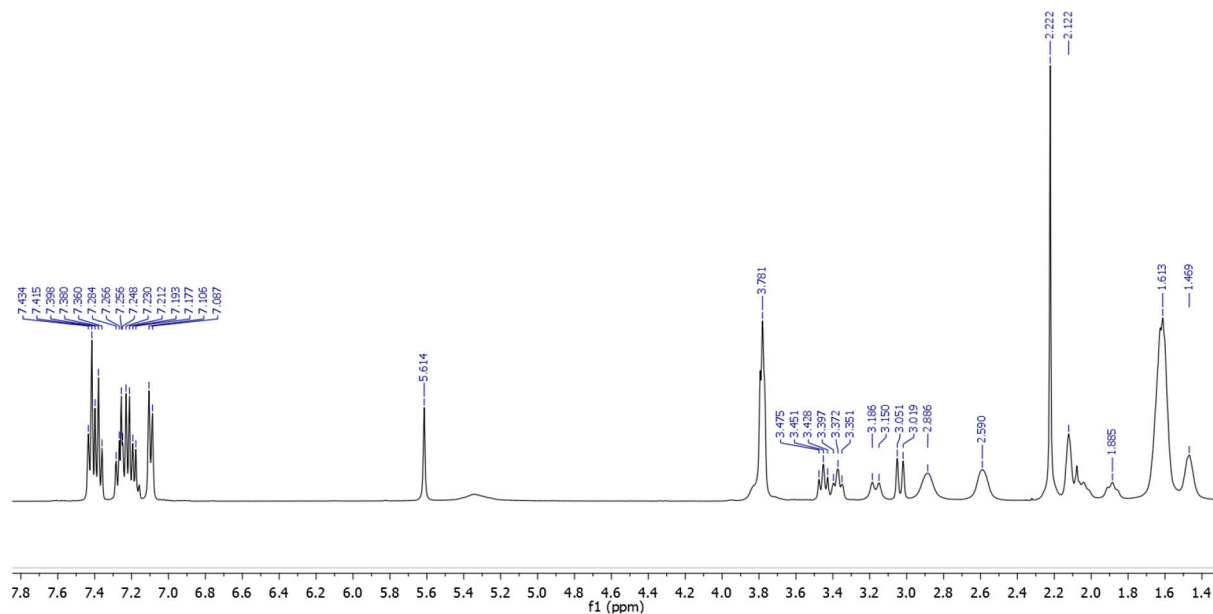

## 23 C nmr

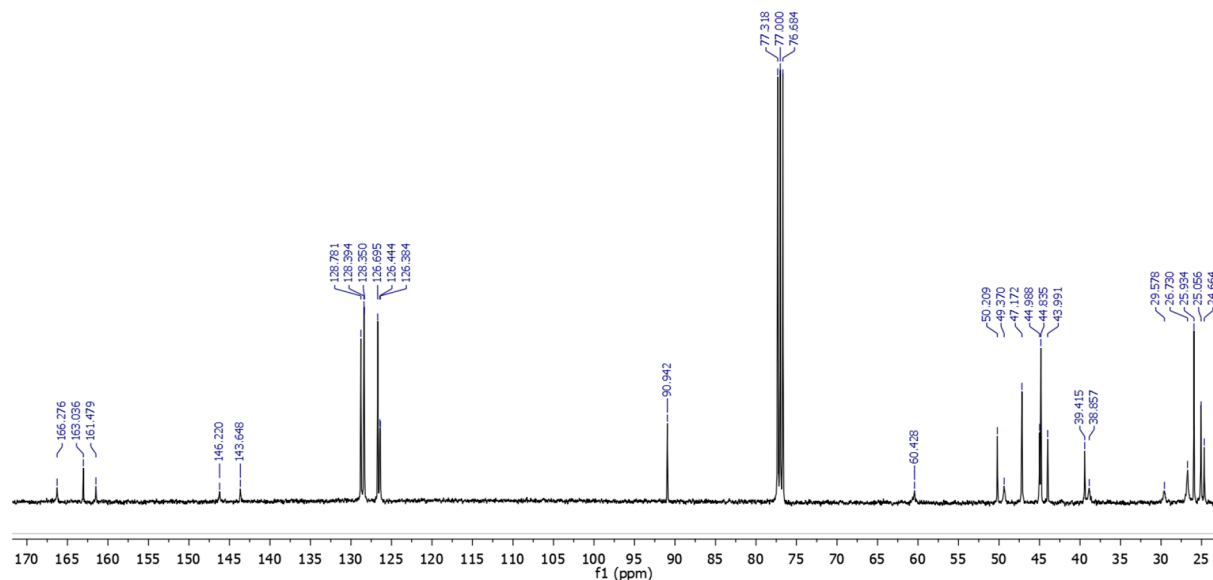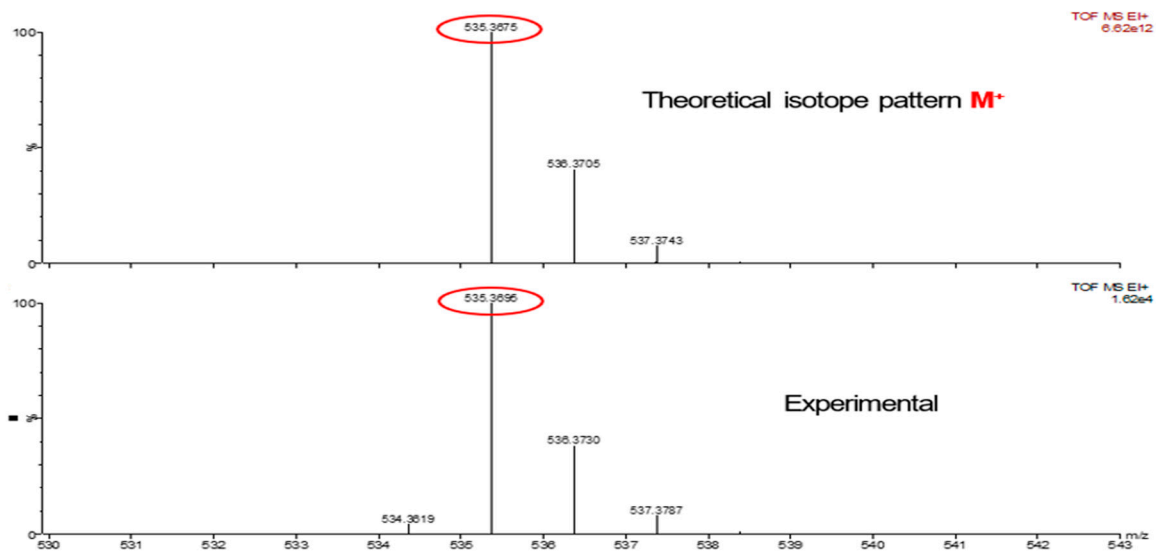



## 24 H nmr

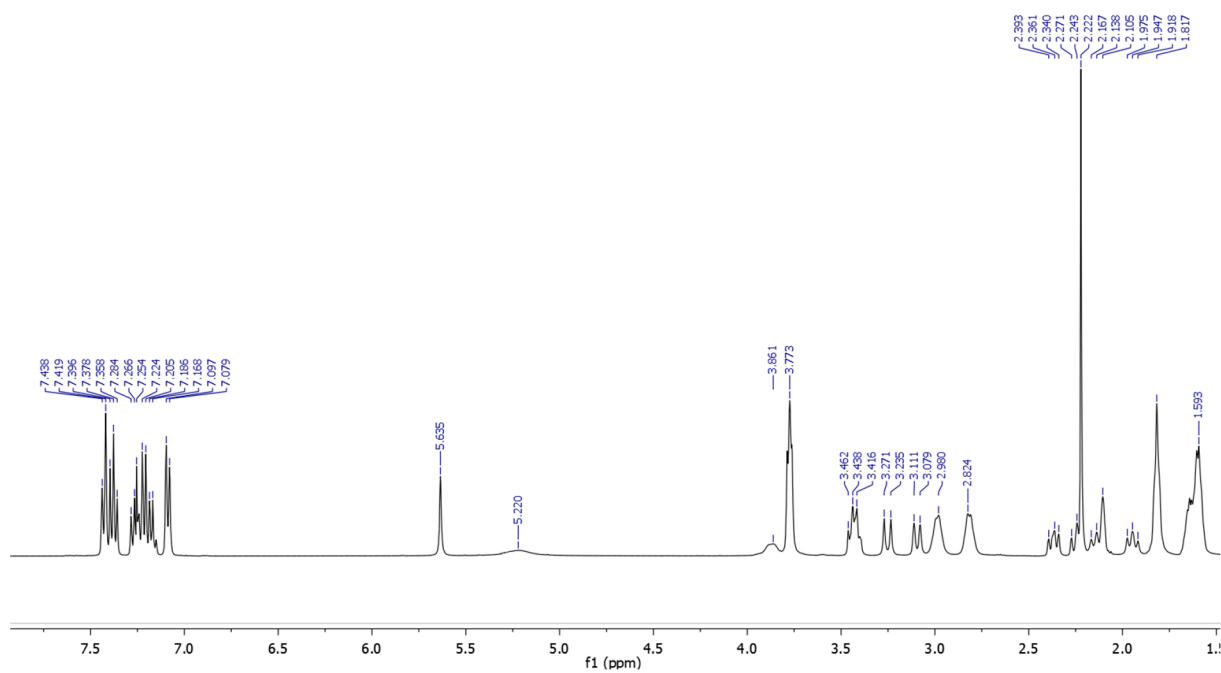

## 24 C nmr

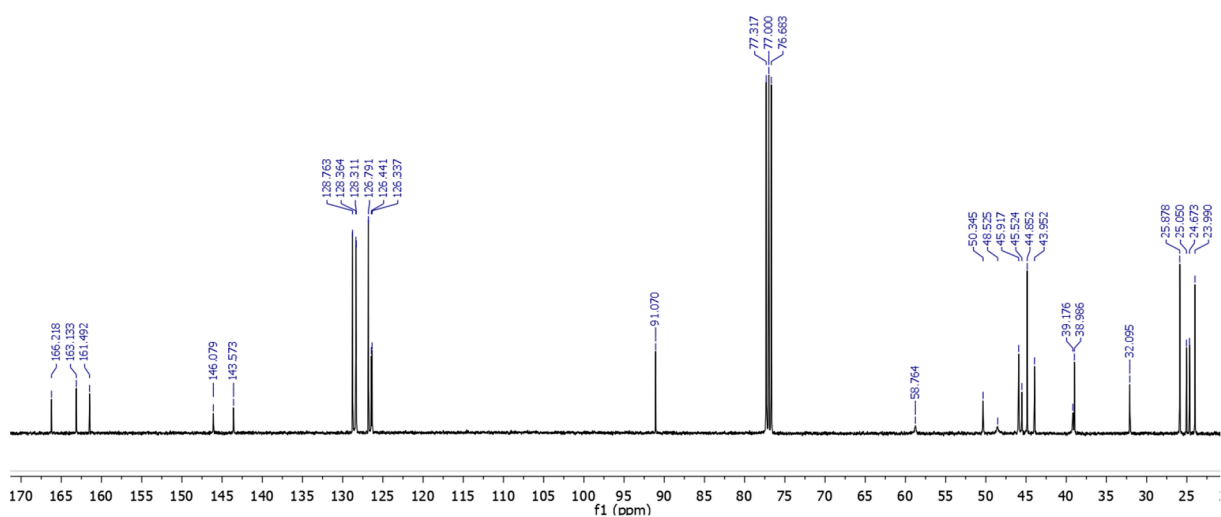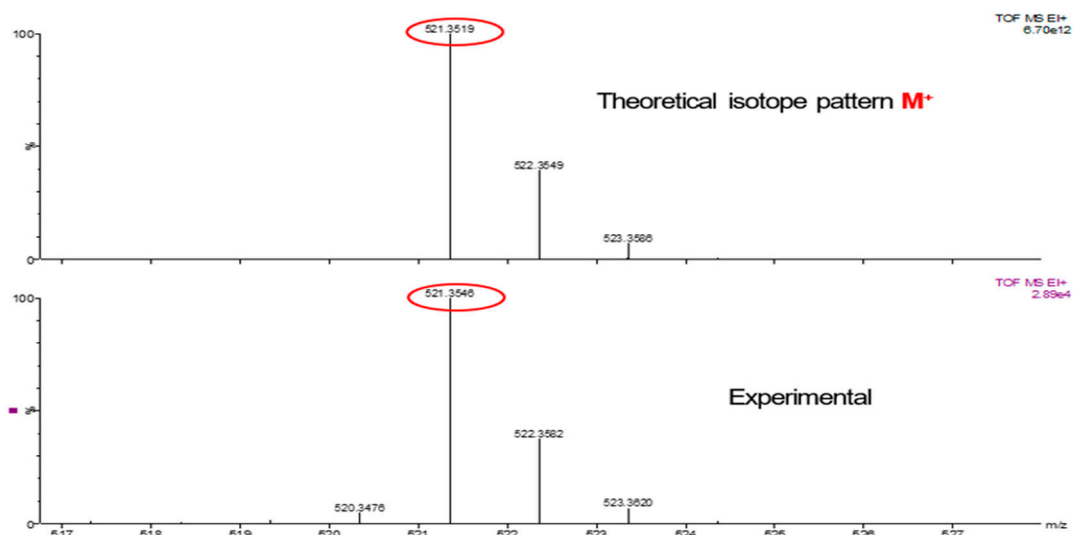

## Synthesis route of compounds 1-4

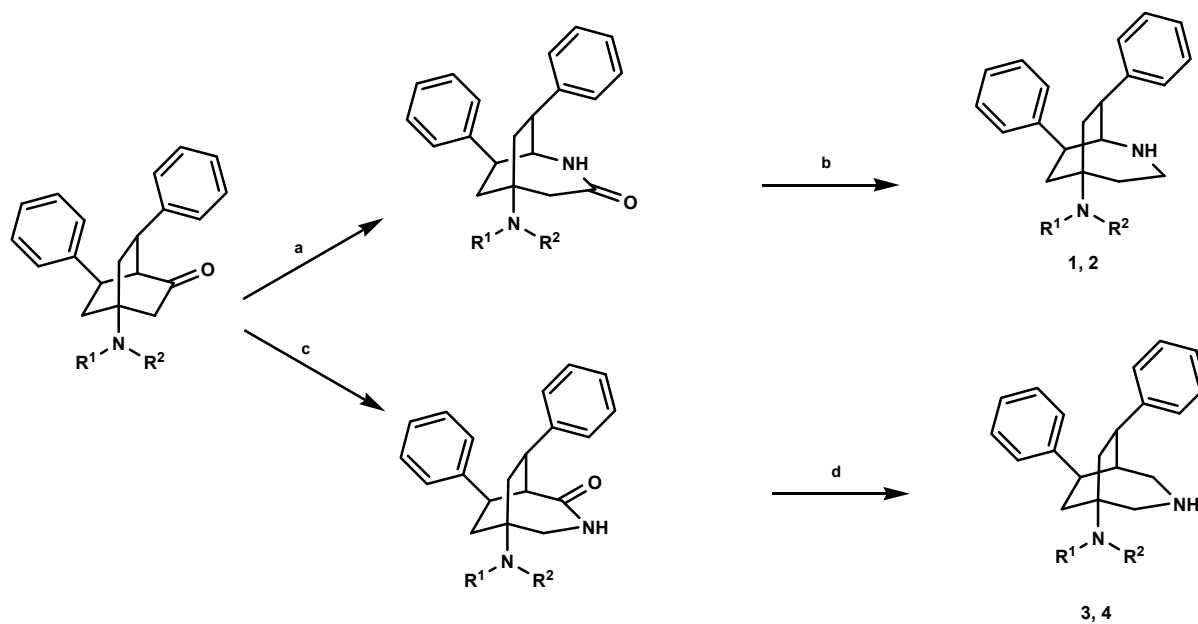

| Compounds | $\text{R}^1+\text{R}^2$ |
|-----------|-------------------------|
| 1, 3      | $-(\text{CH}_2)_5-$     |
| 2, 4      | $-(\text{CH}_2)_4-$     |

Preparation of **1-4**. Reagents and conditions: (a) hydroxylamine-O-sulfonic acid, glacial acetic acid, 145°C, 16h; (b)  $\text{LiAlH}_4$ , diethyl ether, 55°C, 48h; (c)  $\text{NaN}_3$ , conc.  $\text{H}_2\text{SO}_4$ , 20°C; (d)  $\text{LiAlH}_4$ , diethyl ether, 55°C, 18h.
